# Supplementary material for: Diversification of LytM Protein Functions in Polar Elongation and Cell Division of Agrobacterium tumefaciens
Source: PubMed Central journal article supplement (PMC8416486; doi:10.3389/fmicb.2021.729307), 2021-08-18
Supplement: Data_Sheet_1.pdf [file Data_Sheet_1.pdf]

## *Supplementary Material*

### **Diversification of LytM protein functions in polar elongation and cell division of *Agrobacterium tumefaciens***

**Wanda M. Figueroa-Cuilan<sup>1+^</sup>, Amelia M. Randich<sup>2+</sup>, Caroline Dunn<sup>1</sup>, Gustavo Santiago-Collazo<sup>1,3</sup>, Andrew Yowell<sup>1</sup>, and Pamela J.B. Brown<sup>1\*</sup>**

<sup>1</sup>Division of Biological Sciences, University of Missouri-Columbia, Columbia, MO, USA

<sup>2</sup>Department of Biology, University of Scranton, Scranton, PA, USA

<sup>3</sup>Molecular Therapeutics and Pathogenesis Graduate Program, University of Missouri-Columbia, Columbia, MO, USA

<sup>+</sup>denotes equal contributions

Current Addresses:

<sup>^</sup>Department of Biological Chemistry, Johns Hopkins University School of Medicine, Baltimore, MD, USA

<sup>§</sup>Department of Biology, Indiana University, Bloomington, IN, USA

<sup>&</sup>University of Iowa, College of Dentistry and Dental Clinics, Iowa City, IA, USA

**\* Correspondence:**

Pamela Brown

[brownpb@missouri.edu](mailto:brownpb@missouri.edu)

## 1. Supplementary Tables

**Supplementary Table 1. LytM gene, genome accession numbers, and data.**

| IMG Gene ID | Clade | Catalytic Site | SS/LIPO /TM <sup>a</sup> | Other domains <sup>b</sup> | Locus Tag | IMG Genome ID | Genome Name                        | Class                              |
|-------------|-------|----------------|--------------------------|----------------------------|-----------|---------------|------------------------------------|------------------------------------|
| 637055808   | Other | RDHH           | SS                       | DUF4121                    | PA5363    | 637000218     | <i>Pseudomonas aeruginosa</i> PAO1 | Gamma <span>pro</span> teobacteria |
| 637088345   | Other | HDHH           | LIPO                     |                            | CC2297    | 637000061     | <i>Caulobacter vibrioides</i> CB15 | Alphap <span>ro</span> teobacteria |
| 637089355   | Other | HDHH           | no TM                    |                            | CC3301    | 637000061     | <i>Caulobacter vibrioides</i> CB15 | Alphap <span>ro</span> teobacteria |
| 638022820   | Other | HDHH           | LIPO                     |                            | MXAN_1433 | 637000186     | <i>Myxococcus xanthus</i> DK 1622  | Deltap <span>ro</span> teobacteria |
| 638023451   | Other | HDHH           | no TM                    |                            | MXAN_2075 | 637000186     | <i>Myxococcus xanthus</i> DK 1622  | Deltap <span>ro</span> teobacteria |
| 638024911   | Other | HDHH           | TM                       |                            | MXAN_3554 | 637000186     | <i>Myxococcus xanthus</i> DK 1622  | Deltap <span>ro</span> teobacteria |
| 638028210   | Other | -DHH           | no TM                    |                            | MXAN_6905 | 637000186     | <i>Myxococcus xanthus</i> DK 1622  | Deltap <span>ro</span> teobacteria |

|            |       |      |      |        |               |            |                                                     |                     |
|------------|-------|------|------|--------|---------------|------------|-----------------------------------------------------|---------------------|
| 638145539  | Other | HDHH | LIPO |        | HNE_2982      | 637000135  | Hyphomonas<br>neptunium ATCC<br>15444               | Alphaproteobacteria |
| 638145966  | Other | HDHH | LIPO |        | HNE_3409      | 637000135  | Hyphomonas<br>neptunium ATCC<br>15444               | Alphaproteobacteria |
| 648173582  | Other | HDHH | SS   | LysM   | STHERM_c07180 | 648028053  | Spirochaeta<br>thermophila DSM<br>6192              | Spirochaetia        |
| 648173610  | Other | HDHH | TM   | 2xLysM | STHERM_c07460 | 648028053  | Spirochaeta<br>thermophila DSM<br>6192              | Spirochaetia        |
| 648175072  | Other | EDHH | SS   |        | STHERM_c22090 | 648028053  | Spirochaeta<br>thermophila DSM<br>6192              | Spirochaetia        |
| 649960984  | Other | HDHH | TM   |        | Odosp_1646    | 649633078  | Odoribacter<br>splanchnicus<br>1651/6, DSM<br>20712 | Bacteroidia         |
| 2540578544 | Other | HDHH | TM   | CC     | LFE_1702      | 2540341086 | Leptospirillum<br>ferrooxidans C2-3                 | Nitrospira          |
| 2563183931 | Other | ADHH | LIPO | no CC  | XALC_2187     | 2562617136 | Xanthomonas<br>albilineans GPE<br>PC73              | Gammaproteobacteria |

|            |       |      |             |               |                              |            |                                   |                     |
|------------|-------|------|-------------|---------------|------------------------------|------------|-----------------------------------|---------------------|
| 2578483098 | Other | HDHH | SS          | no CC         | EP01_11365                   | 2576861479 | Bdellovibrio bacteriovorus 109J   | Deltaproteobacteria |
| 2804931142 | Other | HDMH | SS          |               | Ga0263390_11406              | 2802429312 | Halobacteriovorax marinus BE01    | Deltaproteobacteria |
| 2832892736 | Other | RDHH | SS          |               | Ga0335562_174                | 2832892563 | Salinimonas sediminis N102        | Gammaproteobacteria |
| 2848965275 | Other | HNQQ | TM          |               | Ga0349804_01_1040985_1041854 | 2848964341 | Flavobacterium album HYN0059      | Flavobacteriia      |
| 637051048  | MepM  | HDHH | no TM       | OapA, Csd3_N2 | PA0667                       | 637000218  | Pseudomonas aeruginosa PAO1       | Gammaproteobacteria |
| 637089086  | MepM  | HDHH | TM          | Csd3_N2       | CC3034                       | 637000061  | Caulobacter vibrioides CB15       | Alphaproteobacteria |
| 637142884  | MepM  | HDHH | SS (low)/TM |               | NGO1686                      | 637000188  | Neisseria gonorrhoeae FA 1090     | Betaproteobacteria  |
| 637183429  | MepM  | HDHH | TM          |               | SMc02432                     | 637000269  | Sinorhizobium meliloti 1021       | Alphaproteobacteria |
| 637477582  | MepM  | HDHH | TM          | Csd3_N2       | RPA4431                      | 637000239  | Rhodopseudomonas palustris CGA009 | Alphaproteobacteria |
| 638143205  | MepM  | HDHH | TM          |               | HNE_0632                     | 637000135  | Hyphomonas neptunium ATCC 15444   | Alphaproteobacteria |

|           |      |      |                 |                    |                  |           |                                                     |                       |
|-----------|------|------|-----------------|--------------------|------------------|-----------|-----------------------------------------------------|-----------------------|
| 638143206 | MepM | HDHH | TAT<br>(low)/TM | Csd3_N2            | HNE_0633         | 637000135 | Hyphomonas<br>neptunium ATCC<br>15444               | Alphaproteobacteria   |
| 639299496 | MepM | HDHH | TM              | Csd3_N2            | Atu4178          | 639279302 | Agrobacterium<br>tumefaciens C58-<br>UWash          | Alphaproteobacteria   |
| 640673661 | MepM | HDHH | no TM           | Csd3_N2            | CGSHi22121_07155 | 640612215 | Haemophilus<br>influenzae NTHi<br>22.1-21, ST176    | Gammaproteobacteria   |
| 640819612 | MepM | HDHH | SS              |                    | NIS_0343         | 640753037 | Nitratiruptor sp.<br>SB155-2                        | Epsilonproteobacteria |
| 643382839 | MepM | HDHH | TM              | csd3_N,<br>Csd3_N2 | HPG27_464        | 643348558 | Helicobacter<br>pylori G27                          | Epsilonproteobacteria |
| 643724394 | MepM | HDHH | SS              | Csd3_N,<br>Csd3_N2 | NAMH_0648        | 643692029 | Nautilia<br>profundicola Am-<br>H                   | Epsilonproteobacteria |
| 644795258 | MepM | HDHH | no TM           | Csd3_N2            | Vapar_4673       | 644736413 | Variovorax<br>paradoxus S110                        | Betaproteobacteria    |
| 648147843 | MepM | HDHH | TM              | Csd3_N2            | Galf_0360        | 648028028 | Gallionella<br>capsiferriformans<br>ES-2            | Betaproteobacteria    |
| 649962289 | MepM | HDHD | TM              | Csd3_N2            | Odosp_2968       | 649633078 | Odoribacter<br>splanchnicus<br>1651/6, DSM<br>20712 | Bacteroidia           |

|            |      |      |                 |                             |                  |            |                                              |                       |
|------------|------|------|-----------------|-----------------------------|------------------|------------|----------------------------------------------|-----------------------|
| 2508710873 | MepM | HDHH | no TM<br>(weak) | Csd3_N2                     | Dsui_1335        | 2508501046 | Azospira oryzae<br>PS                        | Betaproteobacteria    |
| 2511844843 | MepM | HDHY | SS              |                             | F11_02585        | 2511231162 | Rhodospirillum<br>rubrum F11                 | Alphaproteobacteria   |
| 2511845117 | MepM | HDHH | SS (low)        | Csd3_N2                     | F11_03950        | 2511231162 | Rhodospirillum<br>rubrum F11                 | Alphaproteobacteria   |
| 2563182133 | MepM | HDHH | TM              | OapA,<br>Csd3_N2            | XALC_0382        | 2562617136 | Xanthomonas<br>albilineans GPE<br>PC73       | Gammaproteobacteria   |
| 2600368686 | MepM | HDHH | TM              | OapA_N,<br>LysM,<br>Csd3_N2 | Ga0063390_00146  | 2600254932 | Escherichia coli K-<br>12 MG1655             | Gammaproteobacteria   |
| 2630389325 | MepM | HDHH | TM              | Csd3_N2                     | Ga0078022_11808  | 2627854142 | Nitrosomonas<br>communis Nm2                 | Betaproteobacteria    |
| 2645939808 | MepM | HDHH | LIPO            | OapA,<br>Csd3_N2            | Ga0100913_1168   | 2645727549 | Vibrio cholerae O1                           | Gammaproteobacteria   |
| 2645942972 | MepM | HDHH | TM              | OapA_N,<br>Csd3_N2          | Ga0100913_122285 | 2645727549 | Vibrio cholerae O1                           | Gammaproteobacteria   |
| 2646276661 | MepM | HDHD | TM              | Csd3_N2                     | Ga0046402_113192 | 2645727629 | Desulfovibrio<br>vulgaris RCH1               | Deltaproteobacteria   |
| 2649937682 | MepM | HDHH | SS              | Csd3_N                      | Ga0077940_11324  | 2648501445 | Sulfurovum<br>lithotrophicum<br>ATCC BAA-797 | Epsilonproteobacteria |

|            |      |      |       |                    |                  |            |                                       |                       |
|------------|------|------|-------|--------------------|------------------|------------|---------------------------------------|-----------------------|
| 2668358420 | MepM | HDHH | SS    | Csd3_N,<br>Csd3_N2 | Ga0110964_111228 | 2667527488 | Campylobacter<br>jejuni CJ677CC008    | Epsilonproteobacteria |
| 2689559549 | MepM | HDHH | SS    | Csd3_N,<br>Csd3_N2 | Ga0133481_11408  | 2687453639 | Helicobacter<br>typhlonius 1          | Epsilonproteobacteria |
| 2721281612 | MepM | HDHH | SS    | Csd3_N2            | Ga0174992_112500 | 2718218393 | Chromobacterium<br>vaccinii 21-1      | Betaproteobacteria    |
| 2774609376 | MepM | HDHH | TM    | Csd3_N2            | Ga0226477_11584  | 2773857813 | Pasteurella<br>dagmatis NCTC<br>11617 | Gammaproteobacteria   |
| 2776475379 | MepM | HDHH | TM    | Csd3_N2            | Ga0263277_111259 | 2775506949 | Mariprofundus<br>ferrinatatus CP-8    | Zetaproteobacteria    |
| 2804932538 | MepM | HDHH | LIPO  | Csd3_N2            | Ga0263390_111803 | 2802429312 | Halobacteriovorax<br>marinus BE01     | Deltaproteobacteria   |
| 2812896561 | MepM | HDHH | no TM | Csd3_N2            | Ga0213641_113265 | 2811995033 | Comamonas<br>aquatica CJG             | Betaproteobacteria    |
| 2832895623 | MepM | HDHH | SS    | OapA,<br>Csd3_N2   | Ga0335562_3061   | 2832892563 | Salinimonas<br>sediminis N102         | Gammaproteobacteria   |
| 2832957786 | MepM | HDHH | no TM | OapA,<br>Csd3_N2   | Ga0335639_1724   | 2832956063 | Salinisphaera sp.<br>LB1              | Gammaproteobacteria   |
| 2832958155 | MepM | HDHH | SS    | Csd3_N2            | Ga0335639_2093   | 2832956063 | Salinisphaera sp.<br>LB1              | Gammaproteobacteria   |

|            |      |      |      |         |                                |            |                                         |                     |
|------------|------|------|------|---------|--------------------------------|------------|-----------------------------------------|---------------------|
| 2832959154 | MepM | HDHL | SS   | Csd3_N2 | Ga0335639_3092                 | 2832956063 | Salinisphaera sp.<br>LB1                | Gammaproteobacteria |
| 2848965119 | MepM | HDHC | LIPO | Csd3_N2 | Ga0349804_01_<br>865078_866316 | 2848964341 | Flavobacterium<br>album HYN0059         | Flavobacteriia      |
| 638027156  | MepM | HDHH | SS   |         | MXAN_5829                      | 637000186  | Myxococcus<br>xanthus DK 1622           | Deltaproteobacteria |
| 637055576  | EnvC | WLAY | SS   |         | PA5133                         | 637000218  | Pseudomonas<br>aeruginosa PAO1          | Gammaproteobacteria |
| 637089488  | EnvC | STEY | SS   |         | CC3434                         | 637000061  | Caulobacter<br>vibrioides CB15          | Alphaproteobacteria |
| 637141847  | EnvC | WFGY | SS   |         | NGO0571                        | 637000188  | Neisseria<br>gonorrhoeae FA<br>1090     | Betaproteobacteria  |
| 637183998  | EnvC | LMTY | SS   | 2XCC    | SMc03782                       | 637000269  | Sinorhizobium<br>meliloti 1021          | Alphaproteobacteria |
| 637473293  | EnvC | ESVY | SS   | ATG16   | RPA0168                        | 637000239  | Rhodopseudomonas<br>palustris<br>CGA009 | Alphaproteobacteria |
| 638027073  | EnvC | QDYY | SS   |         | MXAN_5746                      | 637000186  | Myxococcus<br>xanthus DK 1622           | Deltaproteobacteria |
| 638145767  | EnvC | ASET | SS   |         | HNE_3210                       | 637000135  | Hyphomonas<br>neptunium ATCC<br>15444   | Alphaproteobacteria |



|            |      |      |            |       |                  |            |                                            |                       |
|------------|------|------|------------|-------|------------------|------------|--------------------------------------------|-----------------------|
| 639298261  | EnvC | SVTY | SS         |       | Atu2775          | 639279302  | Agrobacterium tumefaciens C58-UWash        | Alphaproteobacteria   |
| 640673221  | EnvC | WVAY | LIPO       | 2X CC | CGSHi22121_04940 | 640612215  | Haemophilus influenzae NTHi 22.1-21, ST176 | Gammaproteobacteria   |
| 640820041  | EnvC | NEKI | LIPO       | 2XCC  | NIS_0757         | 640753037  | Nitratiruptor sp. SB155-2                  | Epsilonproteobacteria |
| 643383075  | EnvC | STRG | no TM      | 2X CC | HPG27_707        | 643348558  | Helicobacter pylori G27                    | Epsilonproteobacteria |
| 643724266  | EnvC | NTAE | SS (low)   | 2XCC  | NAMH_0520        | 643692029  | Nautilia profundicola Am-H                 | Epsilonproteobacteria |
| 648147693  | EnvC | WFGY | SS         |       | Galf_0211        | 648028028  | Gallionella capsiferriformans ES-2         | Betaproteobacteria    |
| 2508710809 | EnvC | WFGY | SS (low)   | ATG16 | Dsui_1271        | 2508501046 | Azospira oryzae PS                         | Betaproteobacteria    |
| 2511845610 | EnvC | LRTY | TAT        |       | F11_06380        | 2511231162 | Rhodospirillum rubrum F11                  | Alphaproteobacteria   |
| 2563182143 | EnvC | SLAY | LIPO (low) |       | XALC_0392        | 2562617136 | Xanthomonas albilineans GPE PC73           | Gammaproteobacteria   |

|            |      |      |          |         |                  |            |                                        |                       |
|------------|------|------|----------|---------|------------------|------------|----------------------------------------|-----------------------|
| 2578483389 | EnvC | HFGY | SS       |         | EP01_12830       | 2576861479 | Bdellovibrio bacteriovorus 109J        | Deltaproteobacteria   |
| 2600370481 | EnvC | WVSY | SS       |         | Ga0063390_01945  | 2600254932 | Escherichia coli K-12 MG1655           | Gammaproteobacteria   |
| 2630391201 | EnvC | WFGY | SS (low) |         | Ga0078022_112687 | 2627854142 | Nitrosomonas communis Nm2              | Betaproteobacteria    |
| 2645943266 | EnvC | WVAY | SS       |         | Ga0100913_122581 | 2645727549 | Vibrio cholerae O1                     | Gammaproteobacteria   |
| 2646275660 | EnvC | VGGY | SS       |         | Ga0046402_112186 | 2645727629 | Desulfovibrio vulgaris RCH1            | Deltaproteobacteria   |
| 2649938043 | EnvC | NTKM | LIPO     | 2XCC    | Ga0077940_11685  | 2648501445 | Sulfurovum lithotrophicum ATCC BAA-797 | Epsilonproteobacteria |
| 2668358482 | EnvC | NVDT | SS       | DUF3450 | Ga0110964_111290 | 2667527488 | Campylobacter jejuni CJ677CC008        | Epsilonproteobacteria |
| 2689560779 | EnvC | NIRS | SS       | 2XCC    | Ga0133481_111639 | 2687453639 | Helicobacter typhlonius 1              | Epsilonproteobacteria |
| 2721280722 | EnvC | WFGY | SS       |         | Ga0174992_111608 | 2718218393 | Chromobacterium vaccinii 21-1          | Betaproteobacteria    |
| 2774610591 | EnvC | WVAY | SS       |         | Ga0226477_111805 | 2773857813 | Pasteurella dagmatis NCTC 11617        | Gammaproteobacteria   |

|            |      |      |          |         |                  |            |                                                     |                     |
|------------|------|------|----------|---------|------------------|------------|-----------------------------------------------------|---------------------|
| 2776476332 | EnvC | LQAY | SS       |         | Ga0263277_112213 | 2775506949 | Mariprofundus<br>ferrinatatus CP-8                  | Zetaproteobacteria  |
| 2804933310 | EnvC | -NKY | SS (low) | 3XCC    | Ga0263390_112575 | 2802429312 | Halobacteriovorax<br>marinus BE01                   | Deltaproteobacteria |
| 2813736977 | EnvC | WTGY | SS       | NPV_P10 | Ga0325206_112587 | 2811995294 | Acidithiobacillus<br>calculus ATCC<br>51756         | Acidithiobacillia   |
| 2832892936 | EnvC | WVNY | other    |         | Ga0335562_374    | 2832892563 | Salinimonas<br>sediminis N102                       | Gammaproteobacteria |
| 2832957764 | EnvC | WWGY | SS       |         | Ga0335639_1702   | 2832956063 | Salinisphaera sp.<br>LB1                            | Gammaproteobacteria |
| 637056001  | EnvC | HDHH | SS       |         | PA5551           | 637000218  | Pseudomonas<br>aeruginosa PAO1                      | Gammaproteobacteria |
| 637773819  | EnvC | SDMH | SS       | ATG16   | Cag_1281         | 637000072  | Chlorobium<br>chlorochromatii<br>CaD3               | Chlorobia           |
| 648173875  | EnvC | VSSF | no TM    | LysM    | STHERM_c10110    | 648028053  | Spirochaeta<br>thermophila DSM<br>6192              | Spirochaetia        |
| 649962061  | EnvC | SGVN | SS       | 2XCC    | Odosp_2736       | 649633078  | Odoribacter<br>splanchnicus<br>1651/6, DSM<br>20712 | Bacteroidia         |

|            |      |      |          |                  |                  |            |                                     |                     |
|------------|------|------|----------|------------------|------------------|------------|-------------------------------------|---------------------|
| 2813737047 | EnvC | HDRH | SS (low) |                  | Ga0325206_112657 | 2811995294 | Acidithiobacillus caldus ATCC 51756 | Acidithiobacillia   |
| 637054833  | LmdC | HDHH | TM       | 2XCC             | PA4404           | 637000218  | Pseudomonas aeruginosa PAO1         | Gammaproteobacteria |
| 637087916  | LmdC | HDHH | TM       | DUF5930+2x<br>CC | CC1872           | 637000061  | Caulobacter vibrioides CB15         | Alphaproteobacteria |
| 637182558  | LmdC | HDHH | TM       | CC               | SMc00539         | 637000269  | Sinorhizobium meliloti 1021         | Alphaproteobacteria |
| 637475586  | LmdC | HDHH | TM       | 2XCC             | RPA2455          | 637000239  | Rhodospseudomonas palustris CGA009  | Alphaproteobacteria |
| 637772705  | LmdC | HDHH | no TM    |                  | Cag_0178         | 637000072  | Chlorobium chlorochromatii CaD3     | Chlorobia           |
| 638026685  | LmdC | HDHH | TM       | 2xCC             | MXAN_5348        | 637000186  | Myxococcus xanthus DK 1622          | Deltaproteobacteria |
| 638145187  | LmdC | HDHH | no TM    | DUF5930+2x<br>CC | HNE_2628         | 637000135  | Hyphomonas neptunium ATCC 15444     | Alphaproteobacteria |
| 639297320  | LmdC | HDHH | TM       | 2XCC             | Atu1832          | 639279302  | Agrobacterium tumefaciens C58-UWash | Alphaproteobacteria |

|            |      |      |       |                        |                |            |                                                     |                       |
|------------|------|------|-------|------------------------|----------------|------------|-----------------------------------------------------|-----------------------|
| 643383866  | LmdC | HDHH | TM    | 1 CC Nterm,<br>1 Cterm | HPG27_1481     | 643348558  | Helicobacter<br>pylori G27                          | Epsilonproteobacteria |
| 643383867  | LmdC | EDKH | other | CC                     | HPG27_1482     | 643348558  | Helicobacter<br>pylori G27                          | Epsilonproteobacteria |
| 643725271  | LmdC | HDHH | TM    |                        | NAMH_1536      | 643692029  | Nautilia<br>profundicola Am-<br>H                   | Epsilonproteobacteria |
| 648147827  | LmdC | HDHH | TM    | 2XCC                   | Galf_0344      | 648028028  | Gallionella<br>capsiferriformans<br>ES-2            | Betaproteobacteria    |
| 648174726  | LmdC | HDHH | TM    |                        | STHERM_c18630  | 648028053  | Spirochaeta<br>thermophila DSM<br>6192              | Spirochaetia          |
| 649961209  | LmdC | HDHH | TM    | 2XCC                   | Odosp_1875     | 649633078  | Odoribacter<br>splanchnicus<br>1651/6, DSM<br>20712 | Bacteroidia           |
| 2508709766 | LmdC | HDHH | TM    | 2XCC                   | Dsui_0228      | 2508501046 | Azospira oryzae<br>PS                               | Betaproteobacteria    |
| 2510234963 | LmdC | HDHH | TM    | DUF5930+2x<br>CC       | RL0149_c014280 | 2510065042 | Roseobacter<br>litoralis Och 149                    | Alphaproteobacteria   |
| 2510238067 | LmdC | HDNH | SS    | 1 CC C-term            | RL0149_p830320 | 2510065042 | Roseobacter<br>litoralis Och 149                    | Alphaproteobacteria   |
| 2511846261 | LmdC | HDHH | TM    | DUF5930+2x<br>CC       | F11_09600      | 2511231162 | Rhodospirillum<br>rubrum F11                        | Alphaproteobacteria   |

|            |      |      |                 |                     |                  |            |                                         |                       |
|------------|------|------|-----------------|---------------------|------------------|------------|-----------------------------------------|-----------------------|
| 2540577598 | LmdC | HDHH | TM              | 2-3xCC              | LFE_0756         | 2540341086 | Leptospirillum<br>ferrooxidans C2-3     | Nitrospira            |
| 2563184549 | LmdC | HDHH | TM              | CC                  | XALC_2806        | 2562617136 | Xanthomonas<br>albilineans GPE<br>PC73  | Gammaproteobacteria   |
| 2578483602 | LmdC | HDHH | TM              | 2xCC                | EP01_13930       | 2576861479 | Bdellovibrio<br>bacteriovorus<br>109J   | Deltaproteobacteria   |
| 2645940631 | LmdC | HDHH | (weak) no<br>TM | CC                  | Ga0100913_11892  | 2645727549 | Vibrio cholerae O1                      | Gammaproteobacteria   |
| 2645942671 | LmdC | HDHH | no TM           | CC (far N-<br>term) | Ga0100913_121983 | 2645727549 | Vibrio cholerae O1                      | Gammaproteobacteria   |
| 2646276526 | LmdC | HDHH | TM              | 2xCC                | Ga0046402_113056 | 2645727629 | Desulfovibrio<br>vulgaris RCH1          | Deltaproteobacteria   |
| 2668358294 | LmdC | HDHH | TM              | CC                  | Ga0110964_111102 | 2667527488 | Campylobacter<br>jejuni CJ677CC008      | Epsilonproteobacteria |
| 2668619681 | LmdC | HDHH | (weak) no<br>TM | DUF5930+2x<br>CC    | Ga0105927_112169 | 2667527571 | Rhodovulum<br>sulfidophilum<br>DSM 1374 | Alphaproteobacteria   |
| 2776474433 | LmdC | HDHH | TM              | 2XCC                | Ga0263277_11312  | 2775506949 | Mariprofundus<br>ferrinatatus CP-8      | Zetaproteobacteria    |
| 2804932147 | LmdC | HDHH | TM              | 2XCC                | Ga0263390_111411 | 2802429312 | Halobacteriovorax<br>marinus BE01       | Deltaproteobacteria   |

|            |      |      |                 |                  |                                  |            |                                           |                     |
|------------|------|------|-----------------|------------------|----------------------------------|------------|-------------------------------------------|---------------------|
| 2832895534 | LmdC | HDHH | no TM<br>(weak) | 2XCC             | Ga0335562_2972                   | 2832892563 | Salinimonas<br>sediminis N102             | Gammaproteobacteria |
| 2841602312 | LmdC | HDHH | TM              | DUF5930+2x<br>CC | Ga0399067_4647                   | 2841597668 | Paracoccus<br>denitrificans ATCC<br>19367 | Alphaproteobacteria |
| 2848966019 | LmdC | HDHH | TM              | 2XCC             | Ga0349804_01_1850860<br>_1851837 | 2848964341 | Flavobacterium<br>album HYN0059           | Flavobacteriia      |
| 637054043  | NlpD | NDKH | LIPO            | LysM             | PA3623                           | 637000218  | Pseudomonas<br>aeruginosa PAO1            | Gammaproteobacteria |
| 637055365  | NlpD | NRKY | LIPO            | LysM             | PA4924                           | 637000218  | Pseudomonas<br>aeruginosa PAO1            | Gammaproteobacteria |
| 637088044  | NlpD | NNQH | SS              | 4xLysM           | CC1996                           | 637000061  | Caulobacter<br>vibrioides CB15            | Alphaproteobacteria |
| 637142275  | NlpD | NDQH | other           | LysM             | NGO1056                          | 637000188  | Neisseria<br>gonorrhoeae FA<br>1090       | Betaproteobacteria  |
| 637182337  | NlpD | NNQH | LIPO            | 2x LysM          | SMc02060                         | 637000269  | Sinorhizobium<br>meliloti 1021            | Alphaproteobacteria |
| 637475976  | NlpD | NNQH | LIPO            | 2xLysM           | RPA2837                          | 637000239  | Rhodopseudomonas<br>palustris<br>CGA009   | Alphaproteobacteria |

|            |      |      |       |        |                  |            |                                            |                     |
|------------|------|------|-------|--------|------------------|------------|--------------------------------------------|---------------------|
| 639297188  | NlpD | NNQH | LIPO  | 2xLysM | Atu1700          | 639279302  | Agrobacterium tumefaciens C58-UWash        | Alphaproteobacteria |
| 640674509  | NlpD | NDKH | LIPO  | LysM   | CGSHi22121_01077 | 640612215  | Haemophilus influenzae NTHi 22.1-21, ST176 | Gammaproteobacteria |
| 644792400  | NlpD | NDKH | LIPO  | LysM   | Vapar_1799       | 644736413  | Variovorax paradoxus S110                  | Betaproteobacteria  |
| 644792612  | NlpD | NDKH | LIPO  | LysM   | Vapar_2015       | 644736413  | Variovorax paradoxus S110                  | Betaproteobacteria  |
| 648148602  | NlpD | RDKH | LIPO  | LysM   | Galf_1120        | 648028028  | Gallionella capsiferriformans ES-2         | Betaproteobacteria  |
| 2508711508 | NlpD | NDKH | LIPO  | LysM   | Dsui_1970        | 2508501046 | Azospira oryzae PS                         | Betaproteobacteria  |
| 2510236001 | NlpD | NNFH | LIPO  | LysM   | RLO149_c024710   | 2510065042 | Roseobacter litoralis Och 149              | Alphaproteobacteria |
| 2511846158 | NlpD | NNQH | other | 2xLysM | F11_09095        | 2511231162 | Rhodospirillum rubrum F11                  | Alphaproteobacteria |
| 2563182911 | NlpD | RDMH | LIPO  | LysM   | XALC_1160        | 2562617136 | Xanthomonas albilineans GPE PC73           | Gammaproteobacteria |



|            |      |      |      |        |                  |            |                                   |                     |
|------------|------|------|------|--------|------------------|------------|-----------------------------------|---------------------|
| 2600369590 | NlpD | NDRH | LIPO | LysM   | Ga0063390_01052  | 2600254932 | Escherichia coli K-12 MG1655      | Gammaproteobacteria |
| 2600369719 | NlpD | NDRH | LIPO | LysM   | Ga0063390_01181  | 2600254932 | Escherichia coli K-12 MG1655      | Gammaproteobacteria |
| 2630388615 | NlpD | TSKH | LIPO | LysM   | Ga0078022_1197   | 2627854142 | Nitrosomonas communis Nm2         | Betaproteobacteria  |
| 2645943067 | NlpD | NDRH | LIPO | LysM   | Ga0100913_122380 | 2645727549 | Vibrio cholerae O1                | Gammaproteobacteria |
| 2668620376 | NlpD | NDFH | LIPO | LysM   | Ga0105927_112865 | 2667527571 | Rhodovulum sulfidophilum DSM 1374 | Alphaproteobacteria |
| 2721280365 | NlpD | NEKH | LIPO | LysM   | Ga0174992_111248 | 2718218393 | Chromobacterium vaccinii 21-1     | Betaproteobacteria  |
| 2721280713 | NlpD | NDMH | LIPO | LysM   | Ga0174992_111599 | 2718218393 | Chromobacterium vaccinii 21-1     | Betaproteobacteria  |
| 2774610438 | NlpD | NDKH | LIPO | 2xLysM | Ga0226477_111651 | 2773857813 | Pasteurella dagmatis NCTC 11617   | Gammaproteobacteria |
| 2812894540 | NlpD | NDKH | LIPO | LysM   | Ga0213641_111237 | 2811995033 | Comamonas aquatica CJG            | Betaproteobacteria  |
| 2832893034 | NlpD | QEKH | LIPO | LysM   | Ga0335562_472    | 2832892563 | Salinimonas sediminis N102        | Gammaproteobacteria |

|            |              |      |       |             |                  |            |                                                     |                     |
|------------|--------------|------|-------|-------------|------------------|------------|-----------------------------------------------------|---------------------|
| 2832958965 | NlpD         | REMH | LIPO  | LysM        | Ga0335639_2903   | 2832956063 | Salinisphaera sp.<br>LB1                            | Gammaproteobacteria |
| 2841599160 | NlpD         | ND-H | LIPO  | LysM        | Ga0399067_1495   | 2841597668 | Paracoccus<br>denitrificans ATCC<br>19367           | Alphaproteobacteria |
| 638025794  | NlpD-<br>HDH | HDHH | LIPO  | LysM        | MXAN_4449        | 637000186  | Myxococcus<br>xanthus DK 1622                       | Deltaproteobacteria |
| 649961103  | NlpD-<br>HDH | HDHH | LIPO  |             | Odosp_1768       | 649633078  | Odoribacter<br>splanchnicus<br>1651/6, DSM<br>20712 | Bacteroidia         |
| 2578482061 | NlpD-<br>HDH | HDHH | LIPO  |             | EP01_06065       | 2576861479 | Bdellovibrio<br>bacteriovorus<br>109J               | Deltaproteobacteria |
| 2646273945 | NlpD-<br>HDH | HDHH | no TM | Rod-binding | Ga0046402_11465  | 2645727629 | Desulfovibrio<br>vulgaris RCH1                      | Deltaproteobacteria |
| 2776475154 | NlpD-<br>HDH | HDHH | LIPO  | LysM        | Ga0263277_111034 | 2775506949 | Mariprofundus<br>ferrinatatus CP-8                  | Zetaproteobacteria  |
| 2804932502 | NlpD-<br>HDH | HDHH | LIPO  |             | Ga0263390_111766 | 2802429312 | Halobacteriovorax<br>marinus BE01                   | Deltaproteobacteria |
| 637088295  | LdpB         | HDHC | no TM |             | CC2248           | 637000061  | Caulobacter<br>vibrioides CB15                      | Alphaproteobacteria |
| 638024079  | LdpB         | HDHH | SS    |             | MXAN_2713        | 637000186  | Myxococcus<br>xanthus DK 1622                       | Deltaproteobacteria |

|            |      |      |          |      |                  |            |                                              |                       |
|------------|------|------|----------|------|------------------|------------|----------------------------------------------|-----------------------|
| 640819691  | LdpB | HDHH | TM       |      | NIS_0417         | 640753037  | Nitratiruptor sp.<br>SB155-2                 | Epsilonproteobacteria |
| 643725284  | LdpB | HDHH | SS (low) |      | NAMH_1549        | 643692029  | Nautilia<br>profundicola Am-<br>H            | Epsilonproteobacteria |
| 648173518  | LdpB | HDHH | SS       |      | STHERM_c06540    | 648028053  | Spirochaeta<br>thermophila DSM<br>6192       | Spirochaetia          |
| 2540576950 | LdpB | HDVH | SS       |      | LFE_0108         | 2540341086 | Leptospirillum<br>ferrooxidans C2-3          | Nitrospira            |
| 2540578364 | LdpB | HDTF | no TM    | CC   | LFE_1522         | 2540341086 | Leptospirillum<br>ferrooxidans C2-3          | Nitrospira            |
| 2563183659 | LdpB | HDHH | no TM    |      | XALC_1914        | 2562617136 | Xanthomonas<br>albilineans GPE<br>PC73       | Gammaproteobacteria   |
| 2646274936 | LdpB | HDHH | TM       |      | Ga0046402_111459 | 2645727629 | Desulfovibrio<br>vulgaris RCH1               | Deltaproteobacteria   |
| 2649937791 | LdpB | HDHH | SS (low) |      | Ga0077940_11433  | 2648501445 | Sulfurovum<br>lithotrophicum<br>ATCC BAA-797 | Epsilonproteobacteria |
| 2668357328 | LdpB | HDHH | TM       | 1 CC | Ga0110964_11135  | 2667527488 | Campylobacter<br>jejuni CJ677CC008           | Epsilonproteobacteria |

|            |      |      |          |                   |                  |            |                                 |                       |
|------------|------|------|----------|-------------------|------------------|------------|---------------------------------|-----------------------|
| 2668358441 | LdpB | HDHH | SS (low) |                   | Ga0110964_111249 | 2667527488 | Campylobacter jejuni CJ677CC008 | Epsilonproteobacteria |
| 2689560212 | LdpB | HDHH | SS       | 2xCC (far N-term) | Ga0133481_111071 | 2687453639 | Helicobacter typhlonius 1       | Epsilonproteobacteria |
| 2689561088 | LdpB | HDHH | TM       |                   | Ga0133481_111949 | 2687453639 | Helicobacter typhlonius 1       | Epsilonproteobacteria |
| 2776474743 | LdpB | HDHH | SS       |                   | Ga0263277_11622  | 2775506949 | Mariprofundus ferrinatatus CP-8 | Zetaproteobacteria    |
| 2804931770 | LdpB | HDHH | LIPO     | CC (far N-term)   | Ga0263390_111034 | 2802429312 | Halobacteriovorax marinus BE01  | Deltaproteobacteria   |
| 2832894423 | LdpB | HDHD | SS       |                   | Ga0335562_1861   | 2832892563 | Salinimonas sediminis N102      | Gammaproteobacteria   |
| 637054206  | LdpB | HDHH | SS       | 2x LytM           | PA3787           | 637000218  | Pseudomonas aeruginosa PAO1     | Gammaproteobacteria   |
| 644794202  | LdpB | HDHH | other    | 2x LytM           | Vapar_3617       | 644736413  | Variovorax paradoxus S110       | Betaproteobacteria    |
| 2508710896 | LdpB | HDHH | SS       | 2x LytM           | Dsui_1358        | 2508501046 | Azospira oryzae PS              | Betaproteobacteria    |
| 2812894571 | LdpB | HDHH | TAT      | 2x LytM           | Ga0213641_111268 | 2811995033 | Comamonas aquatica CJG          | Betaproteobacteria    |

---

<sup>a</sup> Summary of N-terminal signal sequence prediction from SignalP-5.0: SS indicates a standard secretory signal peptide transported by the Sec translocon and cleaved by signal peptidase I; LIPO indicates a lipoprotein signal peptide transported by the Sec translocon and cleaved

by signal peptidase II; and TAT indicates a twin arginine translocon signal peptide transported by TAT and cleaved by signal peptidase I. TM indicates that in the absence of the aforementioned signals, the sequence was predicted to contain a transmembrane segment by TMHMM. “Low” indicates a predicted signal below the standard threshold. “no TM” indicates that no signal sequence or TM was detected.

<sup>b</sup> Protein domains detected in TREND or coiled-coil domains detected by DeepCoil.

**Supplementary Table 2. LytM Clade Member Presence/Absence by Species <sup>a</sup>**

| Class                     | Order               | Genus                                      | MepM | LmdC | LdpB | NlpD (HDH) | NlpD | EnvC | Other |
|---------------------------|---------------------|--------------------------------------------|------|------|------|------------|------|------|-------|
| Acidithiobacillia         | Acidithiobacillales | Acidithiobacillus caldus ATCC 51756        |      |      |      |            |      | 2    |       |
| Alphaproteobacteria       | Caulobacterales     | Caulobacter vibrioides CB15                | 1    | 1    | 1    |            | 1    | 1    | 2     |
| Alphaproteobacteria       | Caulobacterales     | Hyphomonas neptunium ATCC 15444            | 2    | 1    |      |            |      | 1    | 2     |
| Alphaproteobacteria       | Rhizobiales         | Agrobacterium tumefaciens C58-UWash        | 1    | 1    |      |            | 1    | 1    |       |
| Alphaproteobacteria       | Rhizobiales         | Rhodopseudomonas palustris CGA009          | 1    | 1    |      |            | 1    | 1    |       |
| Alphaproteobacteria       | Rhizobiales         | Sinorhizobium meliloti 1021                | 1    | 1    |      |            | 1    | 1    |       |
| Alphaproteobacteria       | Rhodobacterales     | Paracoccus denitrificans ATCC 19367        |      | 1    |      |            | 1    |      |       |
| Alphaproteobacteria       | Rhodobacterales     | Rhodovulum sulfidophilum DSM 1374          |      | 1    |      |            | 1    |      |       |
| Alphaproteobacteria       | Rhodobacterales     | Roseobacter litoralis Och 149              |      | 2    |      |            | 1    |      |       |
| Alphaproteobacteria       | Rhodospirillales    | Rhodospirillum rubrum F11                  | 2    | 1    |      |            | 1    | 1    |       |
| Bacteroides-Flavobacteria | Bacteroidales       | Odoribacter splanchnicus 1651/6, DSM 20712 | 1    | 1    |      | 1          |      | 1    | 1     |
| Betaproteobacteria        | Burkholderiales     | Comamonas aquatica CJG                     | 1    |      | 1    |            | 1    |      |       |
| Betaproteobacteria        | Burkholderiales     | Variovorax paradoxus S110                  | 1    |      | 1    |            | 2    |      |       |
| Betaproteobacteria        | Neisseriales        | Chromobacterium vaccinii 21-1              | 1    |      |      |            | 2    | 1    |       |
| Betaproteobacteria        | Neisseriales        | Neisseria gonorrhoeae FA 1090              | 1    |      |      |            | 1    | 1    |       |
| Betaproteobacteria        | Neisseriales        | Gallionella capsiferriiformans ES-2        | 1    | 1    |      |            | 1    | 1    |       |
| Betaproteobacteria        | Nitrosomonadales    | Nitrosomonas communis Nm2                  | 1    |      |      |            | 1    | 1    |       |
| Betaproteobacteria        | Rhodocyclales       | Azospira oryzae PS                         | 1    | 1    | 1    |            | 1    | 1    |       |
| Chlorobia                 | Chlorobiales        | Chlorobium chlorochromatii CaD3            |      | 1    |      |            |      | 1    |       |
| Deltaproteobacteria       | Bacteriovoracales   | Halobacteriovorax marinus BE01             | 1    | 1    | 1    | 1          |      | 1    | 1     |
| Deltaproteobacteria       | Bdellovibrionales   | Bdellovibrio bacteriovorus 109J            |      | 1    |      | 1          |      | 1    | 1     |
| Deltaproteobacteria       | Desulfovibrionales  | Desulfovibrio vulgaris RCH1                | 1    | 1    | 1    | 1          |      | 1    |       |
| Deltaproteobacteria       | Myxococcales        | Myxococcus xanthus DK 1622                 | 1    | 1    | 1    | 1          |      | 1    | 4     |

|                               |                   |                                               |   |   |   |   |   |   |
|-------------------------------|-------------------|-----------------------------------------------|---|---|---|---|---|---|
| Epsilonproteobacteria         | Campylobacterales | Campylobacter jejuni CJ677CC008               | 1 | 1 | 2 |   | 1 |   |
| Epsilonproteobacteria         | Campylobacterales | Helicobacter pylori G27                       | 1 | 2 |   |   | 1 |   |
| Epsilonproteobacteria         | Campylobacterales | Helicobacter typhlonius 1                     | 1 |   | 2 |   | 1 |   |
| Epsilonproteobacteria         | Nautiliales       | Nautilia profundicola Am-H                    | 1 | 1 | 1 |   | 1 |   |
| Epsilonproteobacteria         | unclassified      | Nitratiruptor sp. SB155-2                     | 1 |   | 1 |   | 1 |   |
| Epsilonproteobacteria         | unclassified      | Sulfurovum lithotrophicum ATCC BAA-797        | 1 |   | 1 |   | 1 |   |
| Bacteroides-<br>Flavobacteria | Flavobacteriales  | Flavobacterium album HYN0059                  | 1 | 1 |   |   |   | 1 |
| Gammaproteobacteria           | Alteromonadales   | Salinimonas sediminis N102                    | 1 | 1 | 1 |   | 1 | 1 |
| Gammaproteobacteria           | Enterobacterales  | Escherichia coli K-12 MG1655                  | 1 |   |   |   | 2 | 1 |
| Gammaproteobacteria           | Pasteurellales    | Haemophilus influenzae NTHi 22.1-21,<br>ST176 | 1 |   |   |   | 1 | 1 |
| Gammaproteobacteria           | Pasteurellales    | Pasteurella dagmatis NCTC 11617               | 1 |   |   |   | 1 | 1 |
| Gammaproteobacteria           | Pseudomonadales   | Pseudomonas aeruginosa PAO1                   | 1 | 1 | 1 |   | 2 | 1 |
| Gammaproteobacteria           | Salinisphaerales  | Salinisphaera sp. LB1                         | 3 |   |   |   | 1 | 1 |
| Gammaproteobacteria           | Vibrionales       | Vibrio cholerae O1                            | 2 | 2 |   |   | 1 | 1 |
| Gammaproteobacteria           | Xanthomonadales   | Xanthomonas albilineans GPE PC73              | 1 | 1 | 1 |   | 1 | 1 |
| Nitrospira                    | Nitrospirales     | Leptospirillum ferrooxidans C2-3              |   |   | 1 | 2 |   | 1 |
| Spirochaetia                  | Spirochaetales    | Spirochaeta thermophila DSM 6192              |   |   | 1 | 1 |   | 1 |
| Zetaproteobacteria            | Mariprofundales   | Mariprofundus ferrinatatus CP-8               | 1 | 1 | 1 | 1 |   | 1 |

<sup>a</sup> Numbers indicate identified genes from each clade; some species had multiple paralogs of certain LytM factors. The “Other” category clusters non-related genes that did not clearly segment into a large clade.

**Supplementary Table 3:** Bacterial strains and plasmids used in this study

| Strain or plasmid                                              | Relevant characteristics                                                                                                               | Reference/Source              |
|----------------------------------------------------------------|----------------------------------------------------------------------------------------------------------------------------------------|-------------------------------|
| pTNS3                                                          | Ap <sup>r</sup> ; helper plasmid encoding the site-specific TnsABCD Tn7 transposition pathway                                          | (Choi KH, et al., 2008)       |
| pUC18-mini-Tn7T-GM-Ptac-sfgfp                                  | Ap <sup>r</sup> Gm <sup>r</sup> ; mini-Tn7 vector containing sfGFP under control of the <i>tac</i> promoter                            | (Figuroa-Cuilan et al., 2016) |
| pUC18-mini-Tn7T-GM-Ptac- <i>Atu1700</i> <sub>STOP</sub> -sfgfp | Ap <sup>r</sup> Gm <sup>r</sup> ; mini-Tn7 vector containing <i>dipM</i> <sub>STOP</sub> under control of the <i>tac</i> promoter      | This study                    |
| pUC18-mini-Tn7T-GM-Plac-sfgfp                                  | Ap <sup>r</sup> Gm <sup>r</sup> ; mini-Tn7 vector containing sfGFP under control of the <i>lac</i> promoter                            | (Figuroa-Cuilan et al., 2016) |
| pUC18-mini-Tn7T-GM-Plac- <i>Atu4178</i> <sub>STOP</sub> -sfgfp | Ap <sup>r</sup> Gm <sup>r</sup> ; mini-Tn7 vector containing <i>rgsM</i> <sub>STOP, ATU</sub> under control of the <i>tac</i> promoter | This study                    |
| pNTPS139                                                       | Km <sup>r</sup> ; Suicide vector containing <i>oriT</i> and <i>sacB</i>                                                                | D. Alley                      |
| pNTPS139 $\Delta$ <i>Atu1700</i>                               | Km <sup>r</sup> Sucs; deletion plasmid for <i>dipM</i> <sub>ATU</sub>                                                                  | This study                    |
| pNTPS139 $\Delta$ <i>Atu2275</i>                               | Km <sup>r</sup> Sucs; deletion plasmid for <i>envC</i> <sub>ATU</sub>                                                                  | This study                    |
| pNTPS139 $\Delta$ <i>Atu4178</i>                               | Km <sup>r</sup> Sucs; deletion plasmid for <i>rgsM</i> <sub>ATU</sub>                                                                  | This study                    |
| pNTPS139 $\Delta$ <i>Atu1340</i>                               | Km <sup>r</sup> Sucs; deletion plasmid for <i>amiC</i> <sub>ATU</sub>                                                                  | This study                    |
| pNTPS139 $\Delta$ <i>Atu2113</i>                               | Km <sup>r</sup> Sucs; deletion plasmid for <i>ampD</i> <sub>ATU</sub>                                                                  | (Figuroa-Cuilan et al., 2020) |
| pSRKKm-Plac                                                    | Km <sup>r</sup> ; pSRKKm vector containing lacI <sup>q</sup> and <i>lac</i> promoter                                                   | (Khan et al., 2008)           |
| pSRKKm-Plac-sfgfp                                              | Km <sup>r</sup> ; pSRKKm vector containing lacI <sup>q</sup> and <i>lac</i>                                                            | (Figuroa-Cuilan et al., 2016) |



|                                                              |                                                                                                                                       |                               |
|--------------------------------------------------------------|---------------------------------------------------------------------------------------------------------------------------------------|-------------------------------|
|                                                              | promoter with sfGFP                                                                                                                   |                               |
| pSRKKm-Pcym- <i>Atu1832-sfgfp</i>                            | Km <sup>r</sup> ; pSRKKm vector containing CuO <sup>q</sup> and <i>cym</i> promoter producing LmdC-sfGFP                              | This study                    |
| pSRKKm-Ptac- <i>sfgfp</i>                                    | Km <sup>r</sup> ; pSRKKm vector containing lacI <sup>q</sup> and <i>tac</i> promoter with sfGFP                                       | (Figuroa-Cuilan et al., 2016) |
| pSRKKm-Ptac- <i>Atu1700<sub>STOP</sub>-sfgfp</i>             | Km <sup>r</sup> ; pSRKKm vector containing lacI <sup>q</sup> and <i>tac</i> promoter for the overproduction of DipM                   | This study                    |
| pUC18-mini-Tn7T-GM-Plac- <i>sfgfp</i>                        | Ap <sup>r</sup> Gm <sup>r</sup> ; mini-Tn7 vector containing sfGFP under control of the <i>lac</i> promoter                           | (Figuroa-Cuilan et al., 2016) |
| pUC18-mini-Tn7T-GM-Plac- <i>Atu4178<sub>STOP</sub>-sfgfp</i> | Ap <sup>r</sup> Gm <sup>r</sup> ; mini-Tn7 vector containing <i>rgsM<sub>STOP, ATU</sub></i> under control of the <i>tac</i> promoter | This study                    |
| pSRKKm-T7medium- <i>sfgfp</i>                                | Km <sup>r</sup> ; pSRKKm vector containing T7 promoter medium expression                                                              | This study                    |
| pSRKKm-T7medium- <i>Atu1340-sfgfp</i>                        | Km <sup>r</sup> ; pSRKKm vector expressing <i>amiC</i> under the T7 medium constitutive control                                       | This study                    |
| pSRKKm-T7medium- <i>Atu2113-sfgfp</i>                        | Km <sup>r</sup> ; pSRKKm vector expressing <i>amiD</i> under the T7 medium constitutive control                                       | This study                    |
| pSRKKm-T7strong- <i>sfgfp</i>                                | Km <sup>r</sup> ; pSRKKm vector containing T7 strong promoter                                                                         | This study                    |
| pSRKKm-T7strong- <i>Atu1700-sfgfp</i>                        | Km <sup>r</sup> ; pSRKKm vector expressing <i>dipM</i> under the T7 strong constitutive control                                       | This study                    |
| pSRKKm-Pcym- <i>sfgfp</i>                                    | Km <sup>r</sup> ; pSRKKm vector                                                                                                       | This study                    |

|                                        |                                                                                                                                                                                   |                           |
|----------------------------------------|-----------------------------------------------------------------------------------------------------------------------------------------------------------------------------------|---------------------------|
|                                        | containing <i>lac</i> promoter flanked by <i>cuO</i> operator site along with the <i>cymR</i> repressor gene                                                                      |                           |
| pSRKKm-Pcym- <i>Atu4178-sfgfp</i>      | Km <sup>r</sup> ; pSRKKm vector containing <i>lac</i> promoter flanked by <i>cuO</i> operator site along with the <i>cymR</i> repressor gene expressing <i>rgsM<sub>ATU</sub></i> | This study                |
| pSRKKm-PenvC- <i>sfgfp</i>             | Km <sup>r</sup> ; pSRKKm vector containing the <i>EnvC</i> promoter                                                                                                               | This study                |
| pSRKKm-PenvC- <i>Atu2775-sfgfp</i>     | Km <sup>r</sup> ; pSRKKm vector containing the <i>envC</i> promoter and producing <i>EnvC</i> under the native control                                                            | This study                |
| pMCS-2                                 | Km <sup>r</sup>                                                                                                                                                                   | (Thanbichler et al. 2007) |
| pMCS-2- <i>Atu1832-IKO</i>             | Km <sup>r</sup> ; pMCS-2 vector containing nt 1172-1771 of <i>Atu1832</i>                                                                                                         | This study                |
| <b><i>E. coli strains</i></b>          |                                                                                                                                                                                   |                           |
| DH5α                                   | Cloning strain                                                                                                                                                                    | Life Technologies         |
| S17-1                                  | Sm <sup>r</sup> ; RP4-2, Tc::Mu, Km-Tn7, for plasmid mobilization                                                                                                                 | (Simon et al., 1983)      |
| S17-1 pNTPS139 $\Delta$ <i>Atu1700</i> | Sm <sup>r</sup> ; RP4-2, Tc::Mu, Km-Tn7, for mobilizing the <i>dipM</i> deletion plasmid                                                                                          | This study                |
| S17-1 pNTPS139 $\Delta$ <i>Atu2775</i> | Sm <sup>r</sup> ; RP4-2, Tc::Mu, Km-Tn7, for mobilizing the <i>envC<sub>ATU</sub></i> deletion plasmid                                                                            | This study                |
| S17-1 pNTPS139 $\Delta$ <i>Atu4178</i> | Sm <sup>r</sup> ; RP4-2, Tc::Mu, Km-Tn7, for mobilizing the <i>rgsM<sub>ATU</sub></i> deletion plasmid                                                                            | This study                |

|                                                                     |                                                                                                                                                      |                               |
|---------------------------------------------------------------------|------------------------------------------------------------------------------------------------------------------------------------------------------|-------------------------------|
| S17-1 pNTPS139<br><i>ΔAtu1340</i>                                   | Sm <sup>r</sup> ; RP4-2, Tc::Mu, Km-Tn7, for mobilizing the <i>amiC<sub>ATU</sub></i> deletion plasmid                                               | This study                    |
| S17-1 pNTPS139<br><i>ΔAtu2113</i>                                   | Sm <sup>r</sup> ; RP4-2, Tc::Mu, Km-Tn7, for mobilizing the <i>amiD<sub>ATU</sub></i> deletion plasmid                                               | (Figuroa-Cuilan et al., 2020) |
| <b><i>A. tumefaciens</i> strains</b>                                |                                                                                                                                                      |                               |
| C58 <i>ΔtetRA::a-attTn7</i>                                         | Parent strain used in this study. <i>tetRA</i> locus was replaced with an artificial <i>attTn7</i> site. Referred to as WT in this study.            | (Figuroa-Cuilan et al., 2016) |
| C58 <i>ΔtetRA::a-attTn7</i> pSRKKm-Plac-sfgfp                       | Km <sup>r</sup> ; C58 <i>ΔtetRA::a-attTn7</i> with pSRK <sub>m</sub> producing sfGFP under the control of the <i>lac</i> promoter                    | (Figuroa-Cuilan et al., 2016) |
| C58 <i>ΔtetRA::a-attTn7</i> pSRKKm-Ptac-sfgfp                       | Km <sup>r</sup> ; C58 <i>ΔtetRA::a-attTn7</i> with pSRK <sub>m</sub> producing sfGFP under the control of the <i>tac</i> promoter                    | (Figuroa-Cuilan et al., 2016) |
| C58 <i>ΔtetRA::a-attTn7</i> pSRKKm-Pcym- <i>Atu1832</i> -sfgfp      | Km <sup>r</sup> ; C58 <i>ΔtetRA::a-attTn7</i> with pSRK <sub>m</sub> producing LmdC-sfGFP under the control of the <i>cym</i> promoter               | This study                    |
| C58 <i>ΔtetRA::a-attTn7</i> pSRKKm-PT7strong-sfgfp                  | Km <sup>r</sup> ; C58 <i>ΔtetRA::a-attTn7</i> with pSRK <sub>m</sub> containing the T7 strong promoter                                               | This study                    |
| C58 <i>ΔtetRA::a-attTn7</i> pSRKKm-PT7strong- <i>Atu1700</i> -sfgfp | Km <sup>r</sup> ; C58 <i>ΔtetRA::a-attTn7</i> with pSRK <sub>m</sub> constitutively producing DipM-sfGFP under the control of the T7 strong promoter | This study                    |
| C58 <i>ΔtetRA::a-attTn7</i> pSRKKm-PenvC-sfgfp                      | Km <sup>r</sup> ; C58 <i>ΔtetRA::a-attTn7</i> with pSRK <sub>m</sub> containing the native <i>envC</i> promoter                                      | This study                    |
| C58 <i>ΔtetRA::a-attTn7</i> pSRKKm-PenvC- <i>Atu2775</i> -sfgfp     | Km <sup>r</sup> ; C58 <i>ΔtetRA::a-attTn7</i> with pSRK <sub>m</sub> producing EnvC-sfGFP under the control of the <i>envC</i> native                | This study                    |

|                                                                                                                               |                                                                                                                                                                                                                                                                                                |                                |
|-------------------------------------------------------------------------------------------------------------------------------|------------------------------------------------------------------------------------------------------------------------------------------------------------------------------------------------------------------------------------------------------------------------------------------------|--------------------------------|
|                                                                                                                               | promoter                                                                                                                                                                                                                                                                                       |                                |
| C58 $\Delta$ <i>tetRA</i> ::a- <i>att</i> Tn7 pSRKKm-Pcym-sfgfp                                                               | Km <sup>r</sup> ; C58 $\Delta$ <i>tetRA</i> ::a- <i>att</i> Tn7 with pSRK <sub>m</sub> containing the <i>lac</i> promoter flanked by <i>cuO</i> operator site along with the <i>cymR</i> repressor gene                                                                                        | This study                     |
| C58 $\Delta$ <i>tetRA</i> ::a- <i>att</i> Tn7 pSRKKm-Pcym- <i>Atu4178</i> -sfgfp                                              | Km <sup>r</sup> ; C58 $\Delta$ <i>tetRA</i> ::a- <i>att</i> Tn7 with pSRK <sub>m</sub> producing RgsM-sfGFP under the control of the <i>cym</i> promoter                                                                                                                                       | This study                     |
| C58 $\Delta$ <i>tetRA</i> ::a- <i>att</i> Tn7 pSRKKm-Ptac- <i>Atu1700</i> <sub>STOP</sub> -sfgfp                              | Km <sup>r</sup> ; C58 $\Delta$ <i>tetRA</i> ::a- <i>att</i> Tn7 with pSRK <sub>m</sub> overproducing DipM under the control of the <i>tac</i> promoter                                                                                                                                         | This study                     |
| C58 $\Delta$ <i>tetRA</i> ::mini-Tn7T-GM-lac-sfgfp                                                                            | Gm <sup>r</sup> ; C58 $\Delta$ <i>tetRA</i> ::a- <i>att</i> Tn7 with mini Tn7 producing sfGFP under the control of the <i>lac</i> promoter                                                                                                                                                     | (Figueroa-Cuilan et al., 2016) |
| C58 $\Delta$ <i>tetRA</i> ::mini-Tn7T-GM-lac- <i>Atu4178</i> <sub>STOP</sub> -sfgfp                                           | Gm <sup>r</sup> ; C58 $\Delta$ <i>tetRA</i> ::a- <i>att</i> Tn7 with mini Tn7 producing RgsM <sub>STOP, ATU</sub> under the control of the <i>lac</i> promoter                                                                                                                                 | This study                     |
| C58 $\Delta$ <i>tetRA</i> ::a- <i>att</i> Tn7 <i>Atu1832</i> ::pMCS-2- <i>Atu1832</i> -IKO                                    | Km <sup>r</sup> ; C58 $\Delta$ <i>tetRA</i> ::a- <i>att</i> Tn7 with insertional knockout of <i>lmdC</i> <sub>ATU</sub>                                                                                                                                                                        | This study                     |
| C58 $\Delta$ <i>tetRA</i> ::mini-Tn7T-GM-lac- <i>Atu4178</i> <sub>STOP</sub> -sfgfp $\Delta$ <i>Atu4178</i>                   | Gm <sup>r</sup> ; C58 $\Delta$ <i>tetRA</i> ::a- <i>att</i> Tn7 $\Delta$ <i>rgsM</i> with mini Tn7 expressing <i>rgsM</i> <sub>STOP, ATU</sub> under the control of the <i>lac</i> promoter                                                                                                    | This study                     |
| C58 $\Delta$ <i>tetRA</i> ::mini-Tn7T-GM-tac- <i>Atu1700</i> <sub>STOP</sub> -sfgfp $\Delta$ <i>Atu1700</i> pSRKKm-Plac-sfgfp | Gm <sup>r</sup> , Km <sup>r</sup> ; C58 $\Delta$ <i>tetRA</i> ::a- <i>att</i> Tn7 $\Delta$ <i>dipM</i> expressing <i>dipM</i> <sub>STOP, ATU</sub> under the control of the <i>tac</i> promoter on the Mini-Tn7 system. DipM depletion strain. Producing extra <i>lac</i> repressor to prevent | This study                     |

|                                                                                                                      |                                                                                                                                                                           |                                |
|----------------------------------------------------------------------------------------------------------------------|---------------------------------------------------------------------------------------------------------------------------------------------------------------------------|--------------------------------|
|                                                                                                                      | promoter leakiness.                                                                                                                                                       |                                |
| C58 $\Delta$ <i>tetRA</i> ::a- <i>attTn7</i> $\Delta$ <i>Atu2775</i>                                                 | Deletion of <i>envC</i> <sub>ATU</sub> in C58 $\Delta$ <i>tetRA</i> ::a- <i>attTn7</i>                                                                                    | This study                     |
| C58 $\Delta$ <i>tetRA</i> ::a- <i>attTn7</i> $\Delta$ <i>Atu1340</i>                                                 | Deletion of <i>amiC</i> <sub>ATU</sub> in C58 $\Delta$ <i>tetRA</i> ::a- <i>attTn7</i>                                                                                    | This study                     |
| C58 $\Delta$ <i>tetRA</i> ::a- <i>attTn7</i> $\Delta$ <i>Atu2113</i>                                                 | Deletion of <i>amiD</i> <sub>ATU</sub> in C58 $\Delta$ <i>tetRA</i> ::a- <i>attTn7</i>                                                                                    | (Figueroa-Cuilan et al., 2020) |
| C58 $\Delta$ <i>tetRA</i> ::a- <i>attTn7</i> $\Delta$ <i>Atu1340<math>\Delta</math><i>Atu2113</i></i>                | Deletion of <i>amiC</i> <sub>ATU</sub> and <i>amiD</i> <sub>ATU</sub> in C58 $\Delta$ <i>tetRA</i> ::a- <i>attTn7</i>                                                     | This study                     |
| C58 $\Delta$ <i>tetRA</i> ::a- <i>attTn7</i> $\Delta$ <i>Atu2775<math>\Delta</math><i>Atu1340</i></i>                | Deletion of <i>amiC</i> <sub>ATU</sub> and <i>envC</i> <sub>ATU</sub> in C58 $\Delta$ <i>tetRA</i> ::a- <i>attTn7</i>                                                     | This study                     |
| C58 $\Delta$ <i>tetRA</i> ::a- <i>attTn7</i> $\Delta$ <i>Atu2775</i> pSRKKm-PenvC-sfgfp                              | Km <sup>r</sup> ; Deletion of <i>envC</i> <sub>ATU</sub> in C58 $\Delta$ <i>tetRA</i> ::a- <i>attTn7</i> with empty vector                                                | This study                     |
| C58 $\Delta$ <i>tetRA</i> ::a- <i>attTn7</i> $\Delta$ <i>Atu2775</i> pSRKKm-PenvC- <i>Atu2775</i> -sfgfp             | Km <sup>r</sup> ; Deletion of <i>envC</i> <sub>ATU</sub> in C58 $\Delta$ <i>tetRA</i> ::a- <i>attTn7</i> carrying complementing plasmid                                   | This study                     |
| C58 $\Delta$ <i>tetRA</i> ::a- <i>attTn7</i> $\Delta$ <i>Atu1340</i> pSRKKm-PT7 medium-sfgfp                         | Km <sup>r</sup> ; Deletion of <i>amiC</i> <sub>ATU</sub> in C58 $\Delta$ <i>tetRA</i> ::a- <i>attTn7</i>                                                                  | This study                     |
| C58 $\Delta$ <i>tetRA</i> ::a- <i>attTn7</i> $\Delta$ <i>Atu1340</i> pSRKKm-PT7medium- <i>Atu1340</i> sfgfp          | Km <sup>r</sup> ; Deletion of <i>amiC</i> <sub>ATU</sub> in C58 $\Delta$ <i>tetRA</i> ::a- <i>attTn7</i> carrying complementing plasmid                                   | This study                     |
| C58 $\Delta$ <i>tetRA</i> ::a- <i>attTn7</i> $\Delta$ <i>Atu1340</i> pSRKKm-Ptac-sfgfp                               | Km <sup>r</sup> ; Deletion of <i>amiC</i> <sub>ATU</sub> in C58 $\Delta$ <i>tetRA</i> ::a- <i>attTn7</i> with pSRKm containing the <i>tac</i> promoter                    | This study                     |
| C58 $\Delta$ <i>tetRA</i> ::a- <i>attTn7</i> $\Delta$ <i>Atu1340</i> pSRKKm-Ptac- <i>dipM</i> <sub>STOP</sub> -sfgfp | Km <sup>r</sup> ; Overexpression of <i>dipM</i> in deletion of <i>amiC</i> <sub>ATU</sub>                                                                                 | This study                     |
| C58 $\Delta$ <i>tetRA</i> ::a- <i>attTn7</i> $\Delta$ <i>Atu2113</i> pSRKKm-Ptac-sfgfp                               | Km <sup>r</sup> ; Deletion of <i>amiD</i> <sub>ATU</sub> in C58 $\Delta$ <i>tetRA</i> ::a- <i>attTn7</i> with pSRKm containing the <i>tac</i> promoter pSRK empty plasmic | This study                     |

|                                                                                                                       |                                                                                                                                                                                         |            |
|-----------------------------------------------------------------------------------------------------------------------|-----------------------------------------------------------------------------------------------------------------------------------------------------------------------------------------|------------|
| C58 $\Delta tetRA::attTn7$ $\Delta Atu2113$<br>pSRKKm-Ptac- <i>Atu1700</i> <sub>STOP</sub> -sfgfp                     | Km <sup>r</sup> ; Overexpression of<br><i>dipM</i> in deletion of <i>amiC</i> <sub>ATU</sub>                                                                                            | This study |
| C58 $\Delta tetRA::a-attTn7$<br>$\Delta Atu1340\Delta Atu2113$ pSRKKm-<br>Ptac-sfgfp                                  | Km <sup>r</sup> ; Double deletion of<br><i>amiC</i> <sub>ATU</sub> and <i>amiD</i> <sub>ATU</sub> in<br>C58 $\Delta tetRA::a-attTn7$ with<br>pSRK containing the <i>tac</i><br>promoter | This study |
| C58 $\Delta tetRA::a-attTn7$<br>$\Delta Atu1340\Delta Atu2113$ pSRKKm-<br>Ptac- <i>Atu1700</i> <sub>STOP</sub> -sfgfp | Km <sup>r</sup> ; Overexpression of<br><i>dipM</i> in the double deletion<br>of <i>amiC</i> <sub>ATU</sub> and <i>amiD</i> <sub>ATU</sub>                                               | This study |

\*ATU = *Agrobacterium tumefaciens* (C58) gene

**Supplementary Table 4**

Synthesized DNA primers used in this study

| Synthesized DNA         | Sequence                                                     |
|-------------------------|--------------------------------------------------------------|
| <b>Primers</b>          |                                                              |
| T7forwardEcoRINdeI      | 5'-AAT TCT AAT ACG ACT CAC TAT AGG GAG ACA-3'                |
| T7revEcoRINdeI          | 5'-TATGTCTCCCTATAGTGAGTCGTATTAG-3'                           |
| Atu1832 pSRK F          | 5'-<br>TCGAGTCAAGGAAGACAGCATATGACTGATACGGCGGAAAA<br>TC-3'    |
| Atu1832-GFPpSRK_R       | 5-<br>AACCAGCAGCGGAGCCAGCGGATCCTTTTAGATAGGTTTTCA<br>GCTCC-3' |
| Atu2775 NdeI F          | 5'-GTCGTCCATATGGATACTGAGCCT-3'                               |
| Atu2775 BamHI R         | 5'-GTCGTCCGATCCTTACGAATCATTGTGCGC-3'                         |
| Atu2775 BamHI (-STOP) R | 5'-GTCGTCCGATCCCGAATCATTGTGCGC-3'                            |
| PenvC EcoRI F           | 5'-GAATTCACGGGTTTCGATTCC-3'                                  |
| Atu2775 AgeI (-STOP) R  | 5'-GTCGTCACCGGTCGAATCATTGTGCGCCCT-3'                         |
| Atu1700 NdeI F          | 5'-GCACGCCATATGGGCCTTGCAAGAAGTGAAATT-3'                      |
| Atu1700 BamHI (-STOP) R | 5'-GTCGCTGGATCCTTCAAGGAAACCTGAT-3'                           |
| Atu1700 BamHI R         | 5'GTCGTCGGATCCCTATTCAAGGAAACCTGATGG-3'                       |
| Atu4178 NdeI F          | 5'-GCGGCGCATATGACTGCGGATCGCAAT-3'                            |
| Atu4178 BamHI (-STOP) R | 5'GCGGCGGGATCCGCGGCTCGCCACCTG-3'                             |
| Atu1340 NdeI F          | 5'-GTCGTCCATATGGATTTACGCGCAGC-3'                             |
| Atu1340 BamHI (-STOP) R | 5'-GTCGTCCGATCCGCCGCCATTCGC-3'                               |
| Atu2113 NdeI F          | 5'-GTCGTCCATATGAAAGAATGTCTGCCGGAT-3'                         |

|                    |                                                             |
|--------------------|-------------------------------------------------------------|
| Atu2113 BamHI R    | 5'-GTCGTCGGATCCGGCGGCCGAAAATCT-3'                           |
| Atu1340 SpeI P1    | 5'-GTCGTCAGTAGGCGCTTGGCCTGCTCCTGGTAT-3'                     |
| Atu1340 P2         | 5'-AAGCTTGGTACCGAATTCGCGCGTGAAATCCATGGCCCT-3'               |
| Atu1340 P3         | 5'-GAATTCGGTACCAAGCTTGCCCTGGCGAATGGCGGCTGA-3'               |
| Atu1340 P4         | 5'-GTCGTCGGATCCATTCTGCCATCAGAGCACCGTTGC-3'                  |
| Atu1340 P5         | 5'-GTCGTCCGATCCGGTCCACGGA-3'                                |
| Atu1340 P6         | 5'-TGGAAGCGCCGACCGGGC-3'                                    |
| Atu1832 IKO pMCS F | 5'-<br>TAAGATCTCGAGCTCCGGAGAATTCCTCATCTTGC GCGACGA<br>CC-3' |
| Atu1832 IKO pMCS R | 5-<br>ACCGGTACGCGTAACGTTCTGAATTCGCCGACATCGTCGGTGC<br>C-3'   |
| Atu2775 SpeI P1    | 5'-GTCGTCAGTAGTGCTTCCAATGCCGAGACCCGCA-3'                    |
| Atu2775 P2         | 5'-<br>AAGCTTGGTACCGAATTCTTGAGGCTCAGTATCCATTTGAAC-<br>3'    |
| Atu2775 P3         | 5'-<br>GAATTCGGTACCAAGCTTGAAGGGCGCACATTGATTCGTAA<br>-3'     |
| Atu2775 BamHI P4   | 5'-GTCGTCGGATCCCACCCTTGC GGATCACCGTCAGCT-3'                 |
| Atu2775 P5         | 5'-CCGCAGGCTATGCTGAATAGAGCG-3'                              |
| Atu2775 P6         | 5'-CAGGTCGAGGACATAGCCCTTCAG-3                               |
| Atu1700 SpeI P1    | 5'-GCTAGACTAGTTCACCGCCGCCTTTAC-3'                           |
| Atu1700 P2         | 5'-AAGCTTGGTACCGAATTCAGACGAATGT-3'                          |
| Atu1700 P3         | 5'-GAATTCGGTACCAAGCTTGGTTTCCTTGA-3'                         |



|                  |                                               |
|------------------|-----------------------------------------------|
| Atu1700 BamHI P4 | 5'-GCATAGGGATCCAAGCACGCCCATCATG-3'            |
| Atu1700 P5       | 5'-TTGAGATCGGCACCGGCAGCGGTTTTA-3'             |
| Atu1700 P6       | 5'-ATCGTCACCGAATTGACGGCGCGCGGCT-3'            |
| Atu4178 SpeI P1  | 5'-GTCGTCACTAGTAAAATCAAACCCCAAAGCTAAA-3'      |
| Atu4178 P2       | 5'-AAGCTTGGTACCGAATTCGATCCGCAGTCATACTAGC-3'   |
| Atu4178 P3       | 5'-GAATTCGGTACCAAGCCTATCAGGTGGCGAGCCGCTGA-3'  |
| Atu4178 BamHI P4 | 5'-GTCGTCGGATCCACAACGACGATGTGGATTCGGTTCGCG-3' |
| Atu4178 P5       | 5'-TGCTCGCGAAATTGGTGTTGTCTCATTAA-3'           |
| Atu4178 P6       | 5'-CCTATCAGGTCGTGTTGTTTCGAT-3'                |

\*R = Reverse, F=Forward primer

\*\*AtuXXXX- Represents *Agrobacterium tumefaciens* gene loci

\*\*\*P1-P4 primers amplify the 500 upstream and downstream regions of the gene loci, whereas P5 and P6 are used to screen for the gene deletion

\*\*\*\*-STOP = Reverse (R) primer does not contain a stop

Tree scale: 1

Bacterial Classes

- Gammaproteobacteria
- Betaproteobacteria
- Acidithiobacillia
- Alphaproteobacteria
- Zetaproteobacteria
- Epsilonproteobacteria
- Deltaproteobacteria
- Nitrospira
- Bacteroidia/Flavobacteria
- Chlorobia
- Spirochaetia

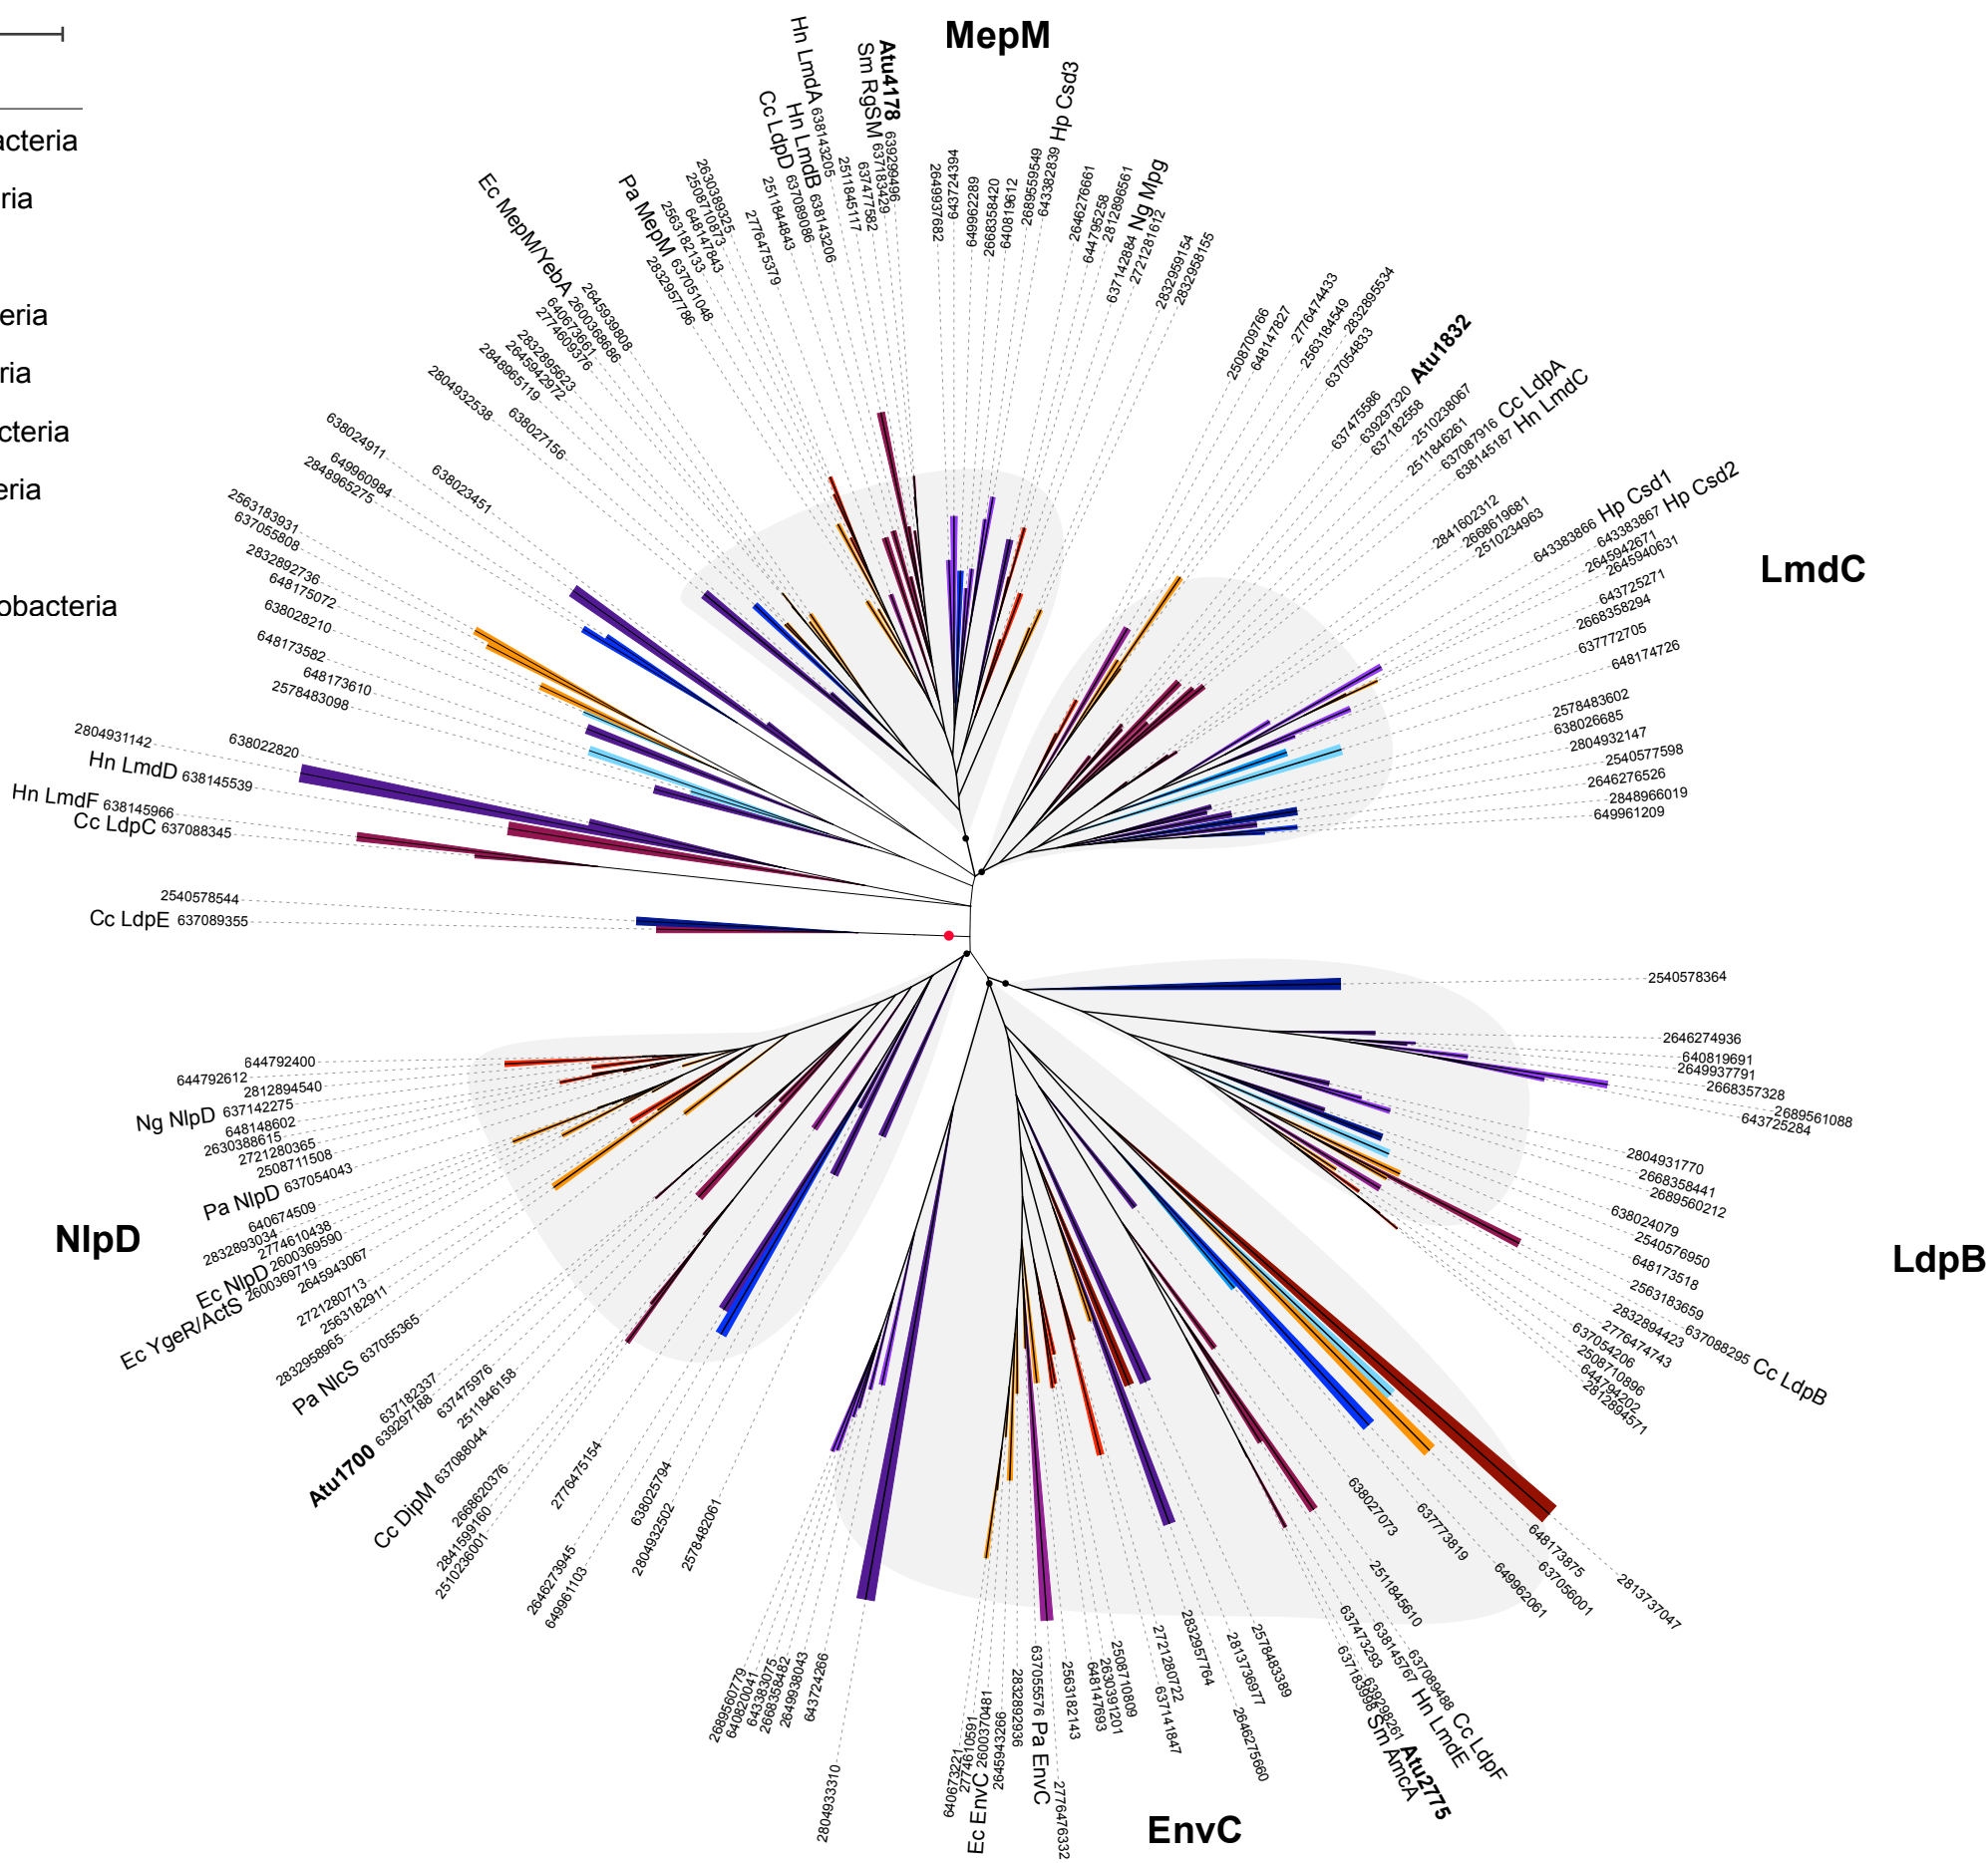

**Supplementary Figure 1.** Unrooted version of the tree in **Figure 1**. Solid black circles indicate the base of each of the five clades, the boundaries of which are outlined in gray shapes and labeled around the periphery. The solid red circle indicates where the root was placed to create **Figure 1**. The root was chosen to best indicate the clades which are also distinguished by shared N-terminal genetic architecture that was not used to construct this tree.

**Bacterial Classes**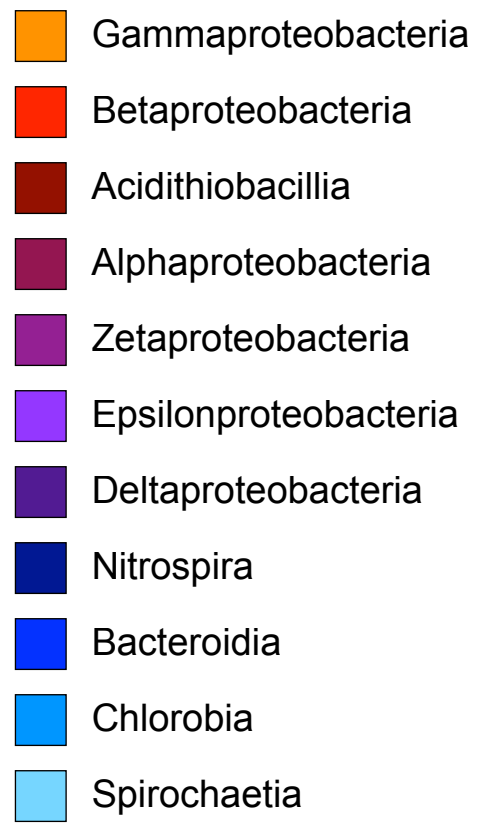**Bootstrap Values**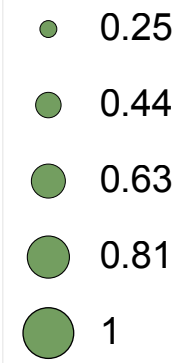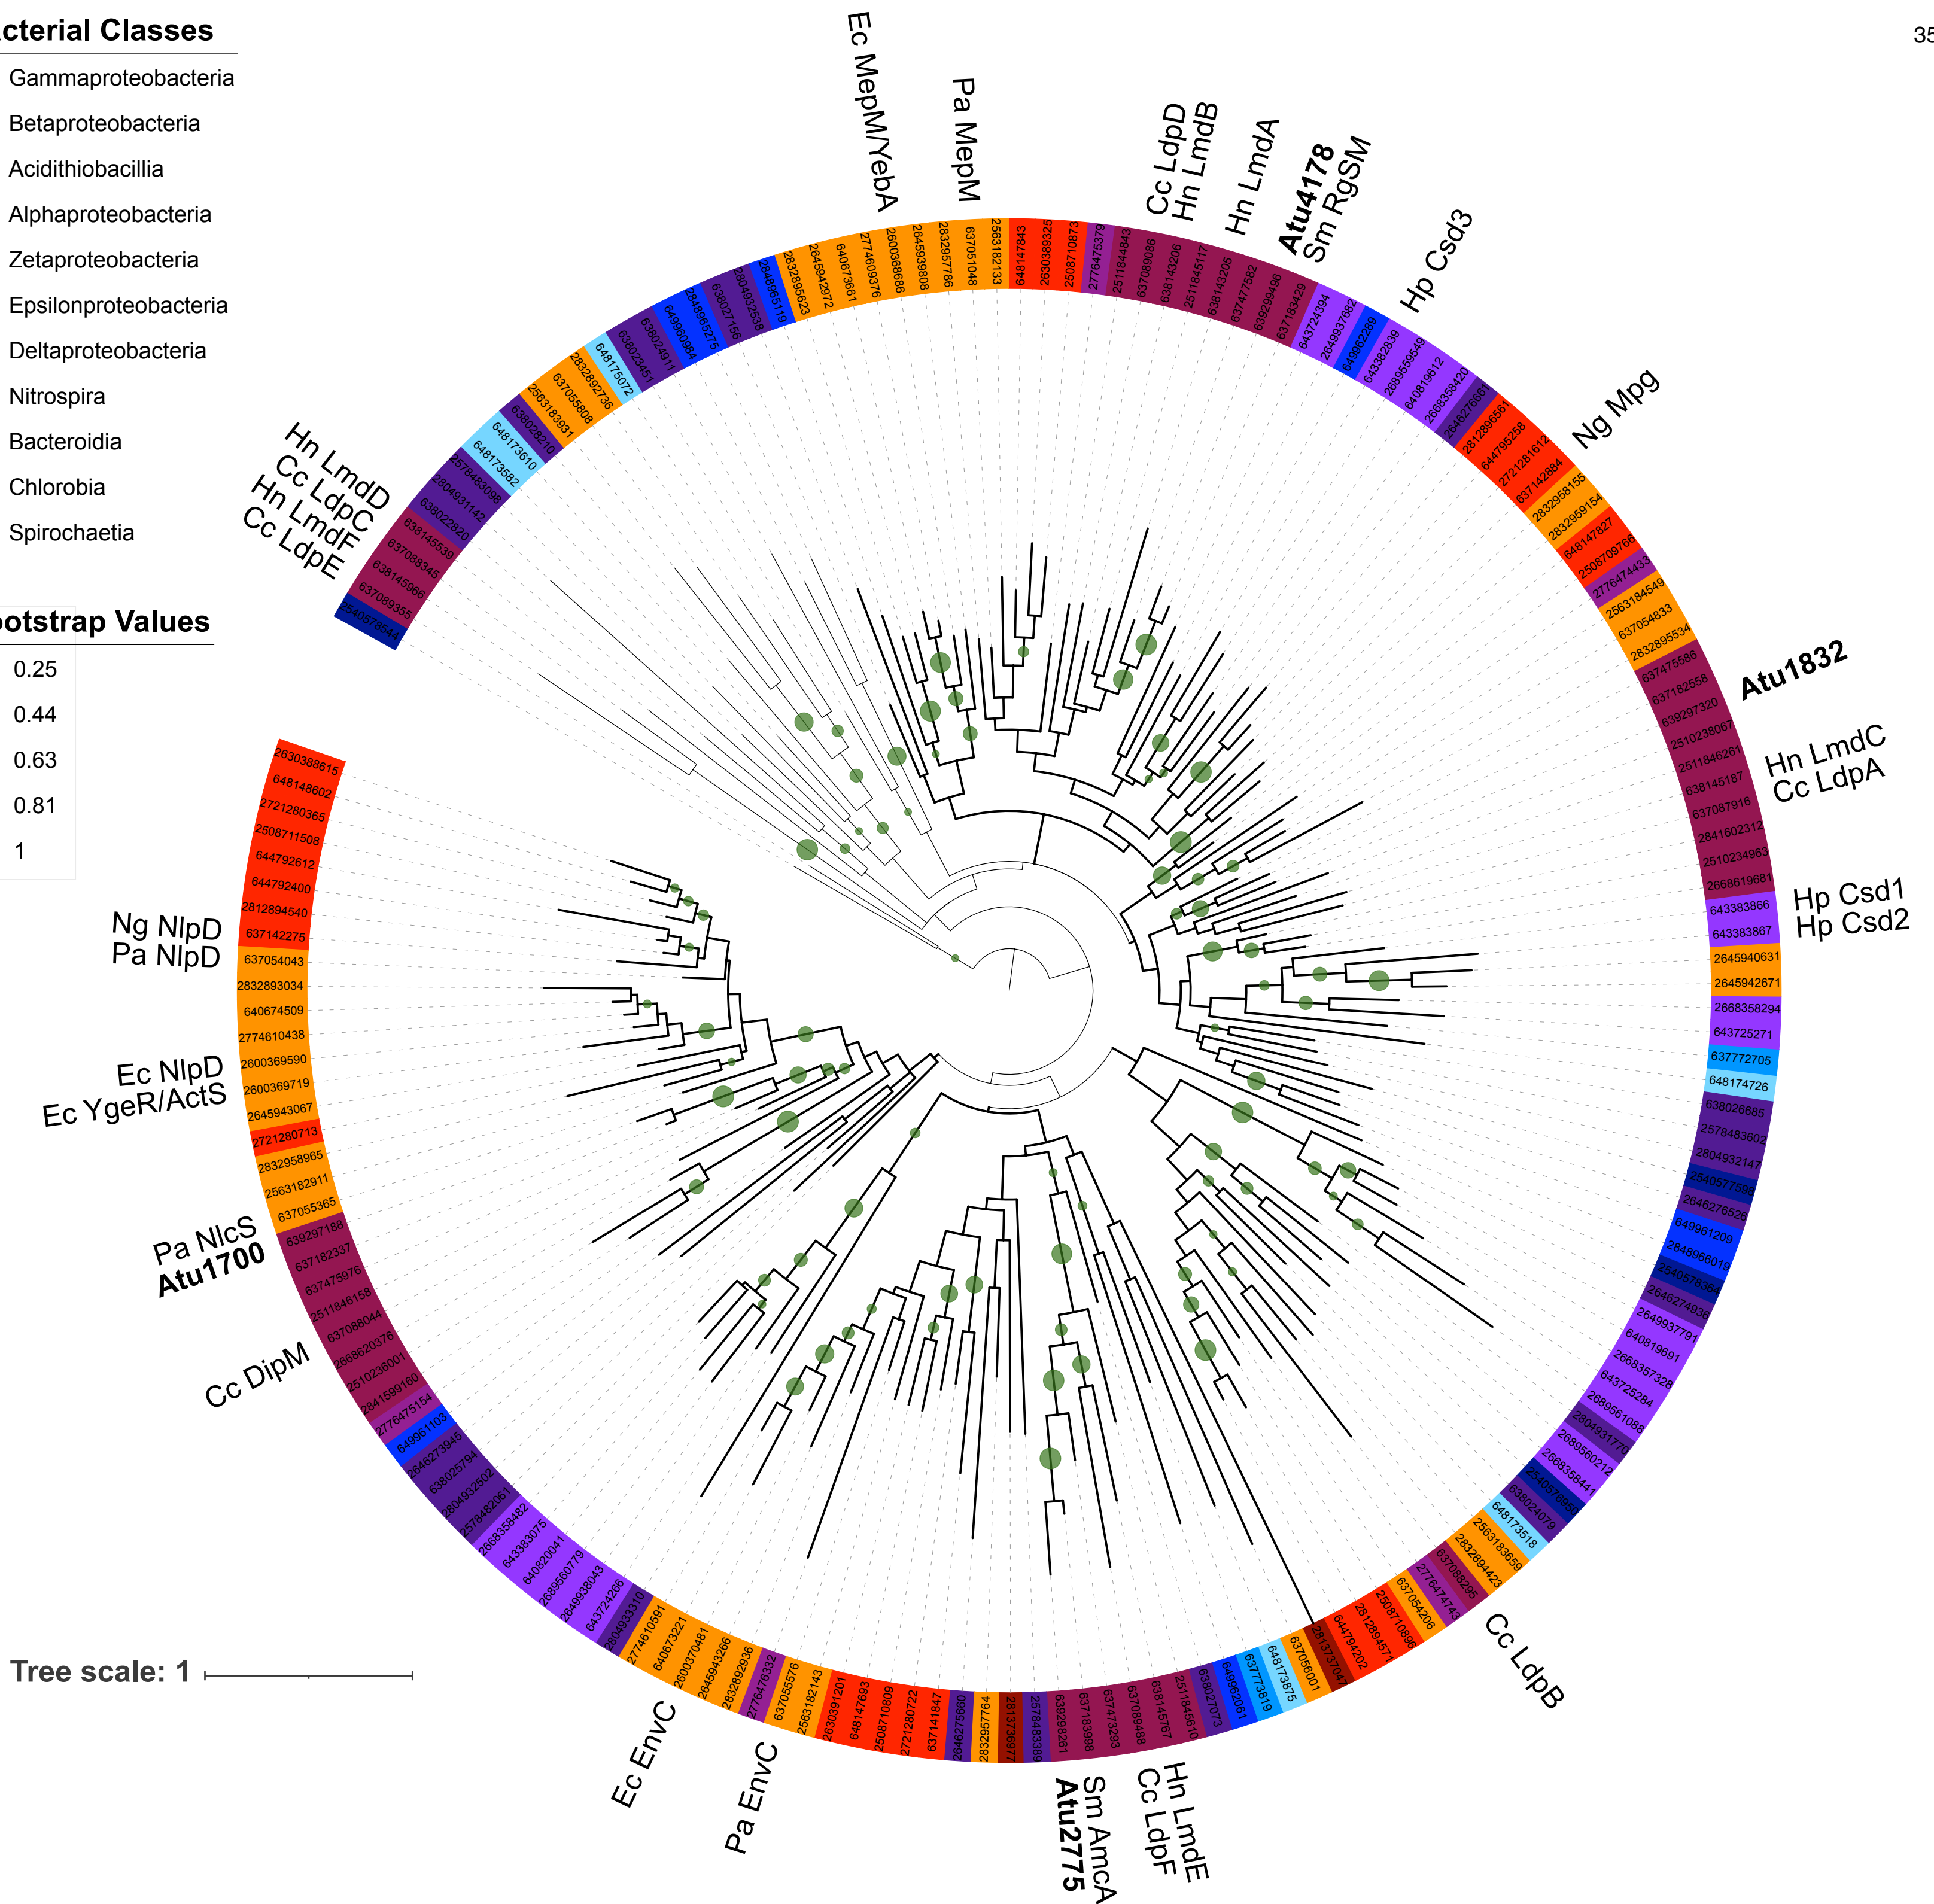

**Supplementary Figure 2.** The maximum likelihood tree from **Figure 1** showing branch lengths and bootstrap values.

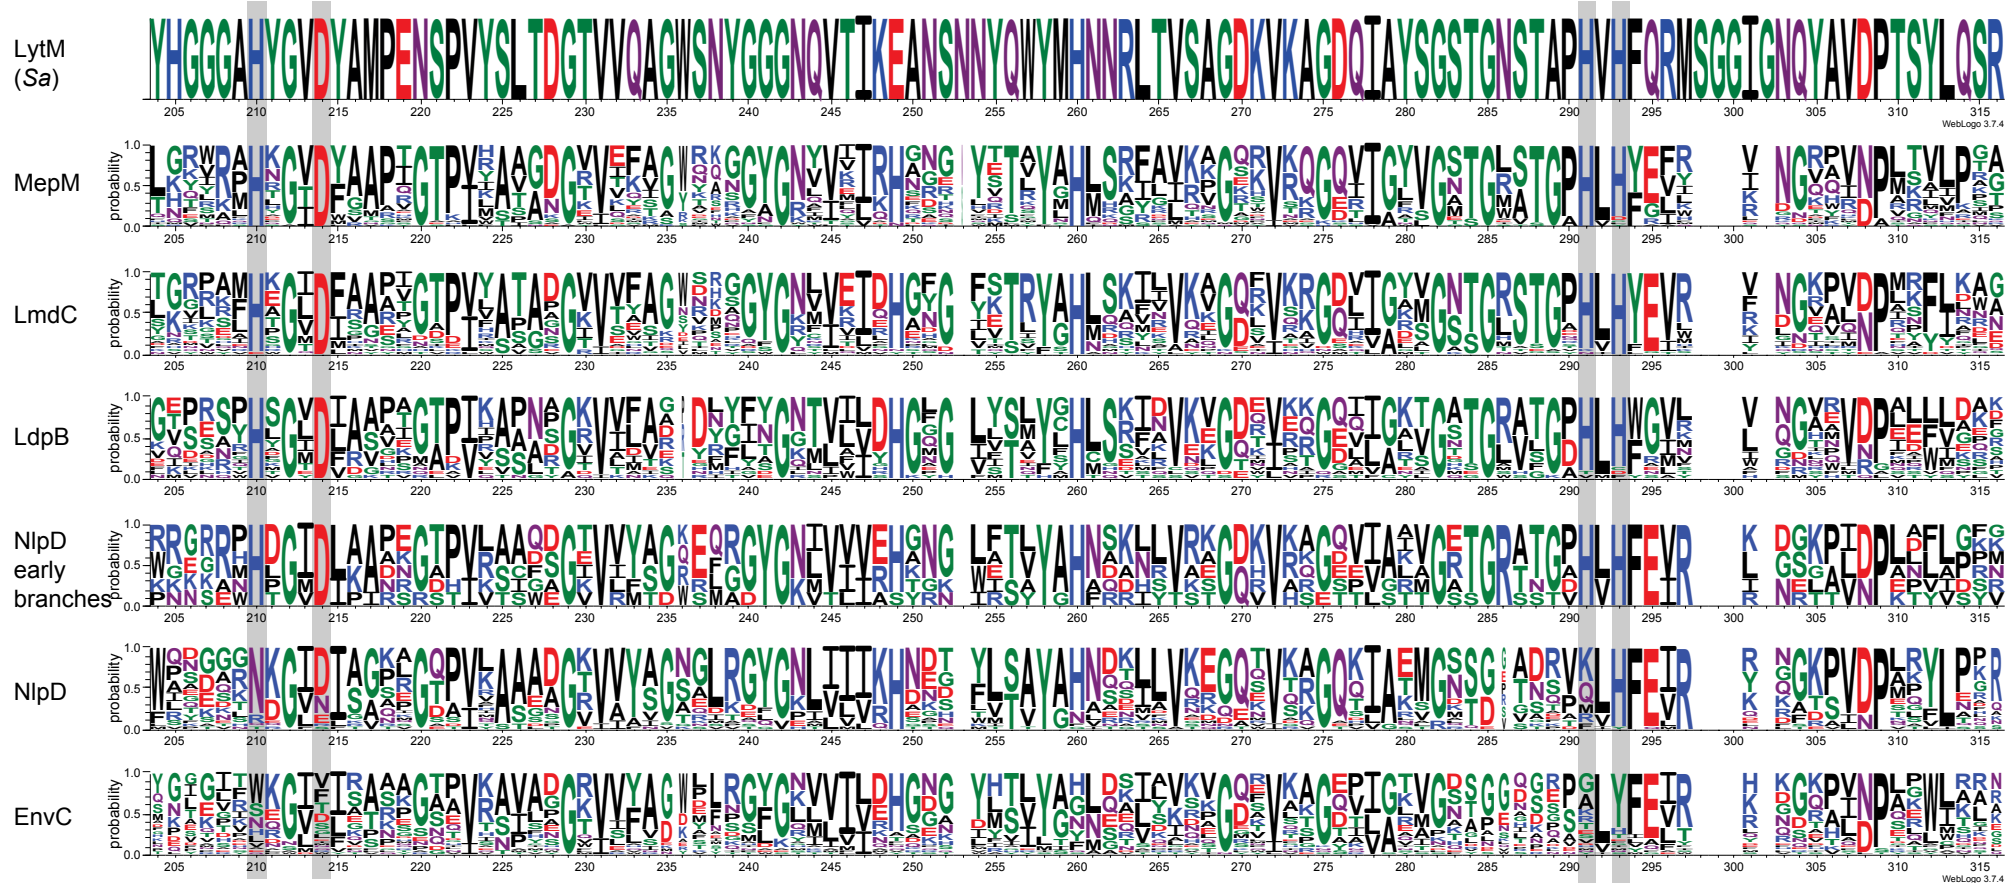

**Supplementary Figure 3.** HMM logos of LytM domain clades made with WebLogo 3. Logos were constructed from protein sequences of clade members indicated in the gene tree in **Figure 1** and in **Supplementary Table 3**. Amino acids are color coded according to chemical properties, with uncharged polar residues in green, neutral residues in purple, basic residues in blue, acidic residues in red, and hydrophobic residues in black. The height of each letter is proportional to the relative frequency of a given identity, and the height of the stack indicates the sequence conservation at that position. *Staphylococcus aureus* LytM numbering is used for ease of comparison. Gray boxes mark conserved positions in the metalloprotease active site for zinc metal coordination.

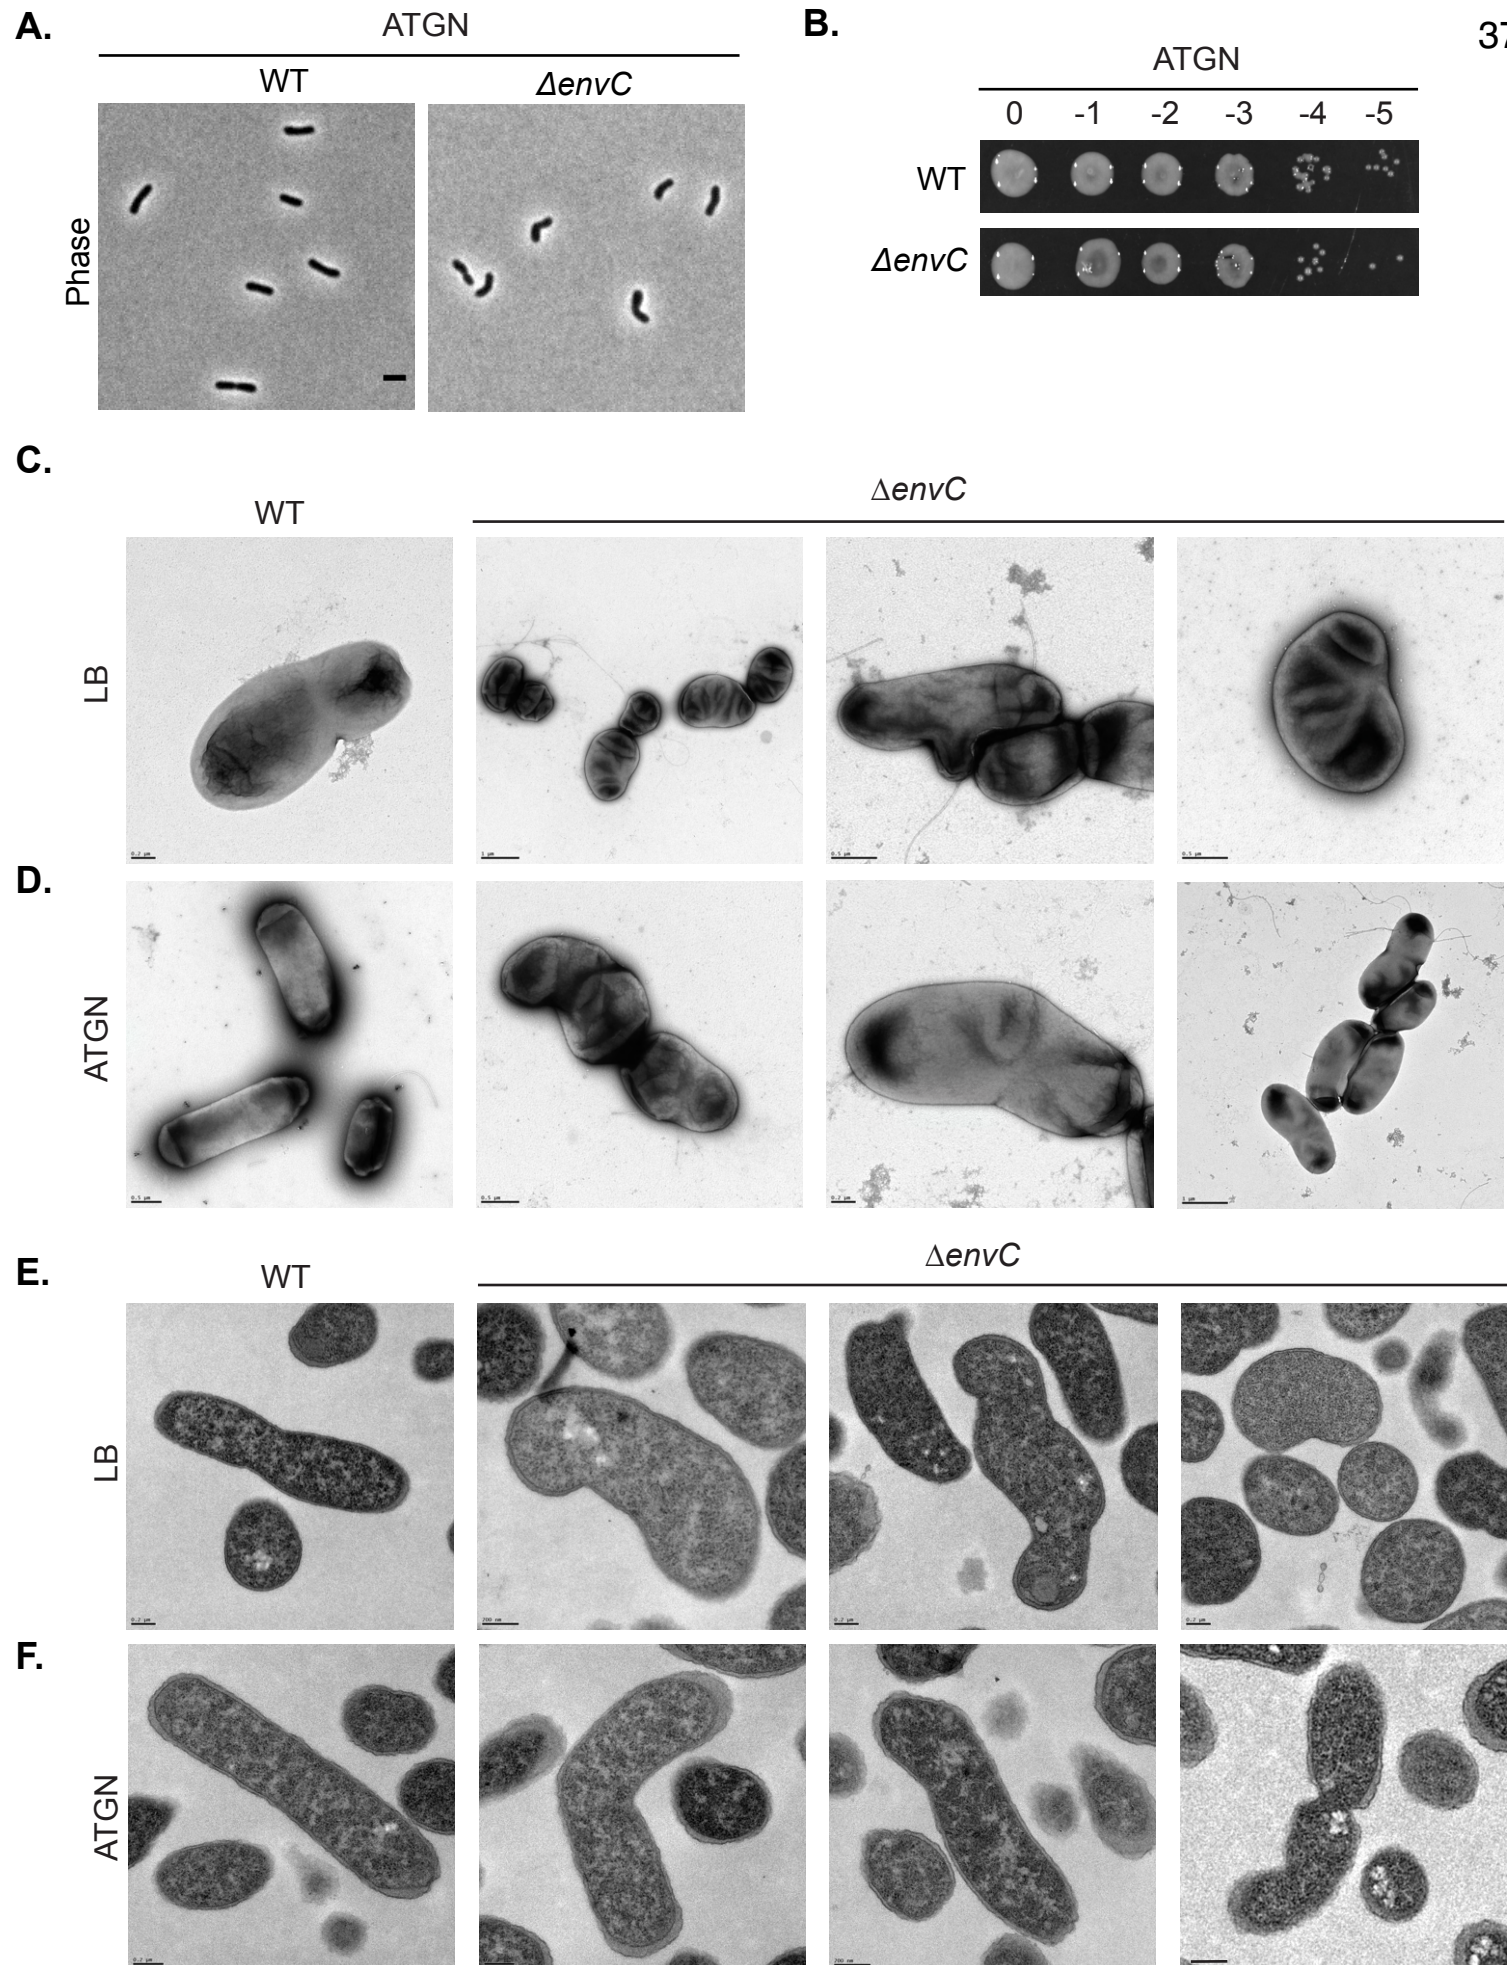

**Supplementary Figure 4. Hypercurvature, bending, and kinking of  $\Delta envC$  cells persists in ATGN medium.** (A) Phase contrast images of WT and  $\Delta envC$  cells grown in ATGN. Scale bar = 2  $\mu$ m. (B) Viability spot assays of WT and  $\Delta envC$  cells grown in ATGN. (C-D) Whole cell transmission electron microscopy of WT and  $\Delta envC$  cells grown in LB (C) and ATGN (D). Note, scale bars are not uniform and are (moving right to left and top to bottom) 0.2  $\mu$ m, 1  $\mu$ m, 0.5  $\mu$ m, 0.5  $\mu$ m, 0.5  $\mu$ m, 0.5  $\mu$ m, 0.2  $\mu$ m, and 1  $\mu$ m. (E-F) Thin section transmission electron microscopy of WT and  $\Delta envC$  cells grown in LB (E) and ATGN (F). Scale bars are 0.2  $\mu$ m for all images in (E) and (F).

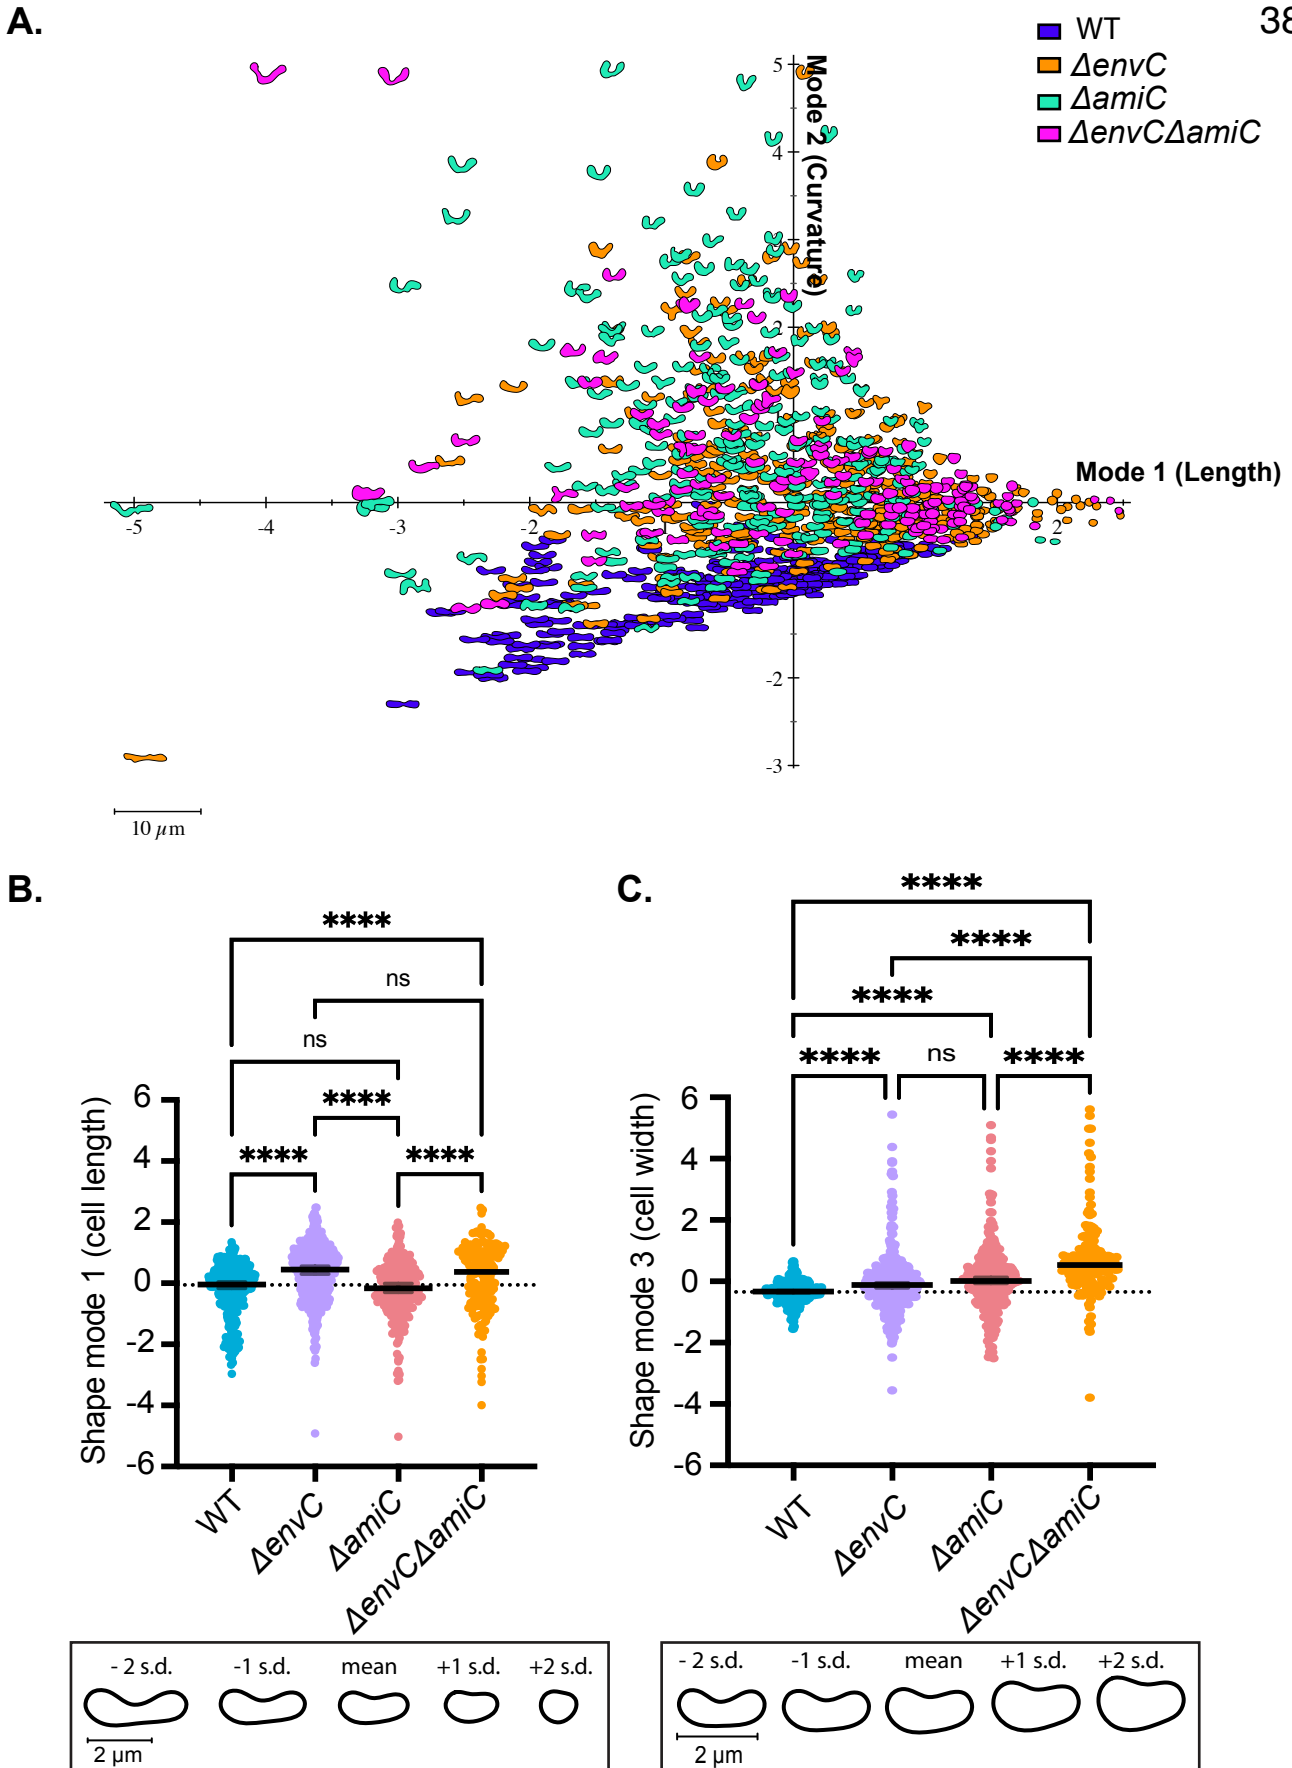

**Supplementary Figure 5. Quantitative characterization of cell shape WT,  $\Delta envC$ ,  $\Delta amiC$  and  $\Delta envC\Delta amiC$ .** (A) Principal-component analysis (PCA) of cell shape for WT,  $\Delta envC$ ,  $\Delta amiC$  and  $\Delta envC\Delta amiC$ . Shape modes 1, 2 and 3 approximately capture cell length, curvature, and width, respectively. Shape modes 1 (B) and 2 (C) values were plotted. Error bars represent mean  $\pm$  SEM. The black dashed line represents the WT mean. A Kruskal-Wallis test with Dunn's posttest was used to compare the means of shape mode 1 and a One Way ANOVA with a Tukey posttest was used to compare the means of shape mode 3. \*\*\*\*,  $P \leq 0.0001$ , ns = not significant.

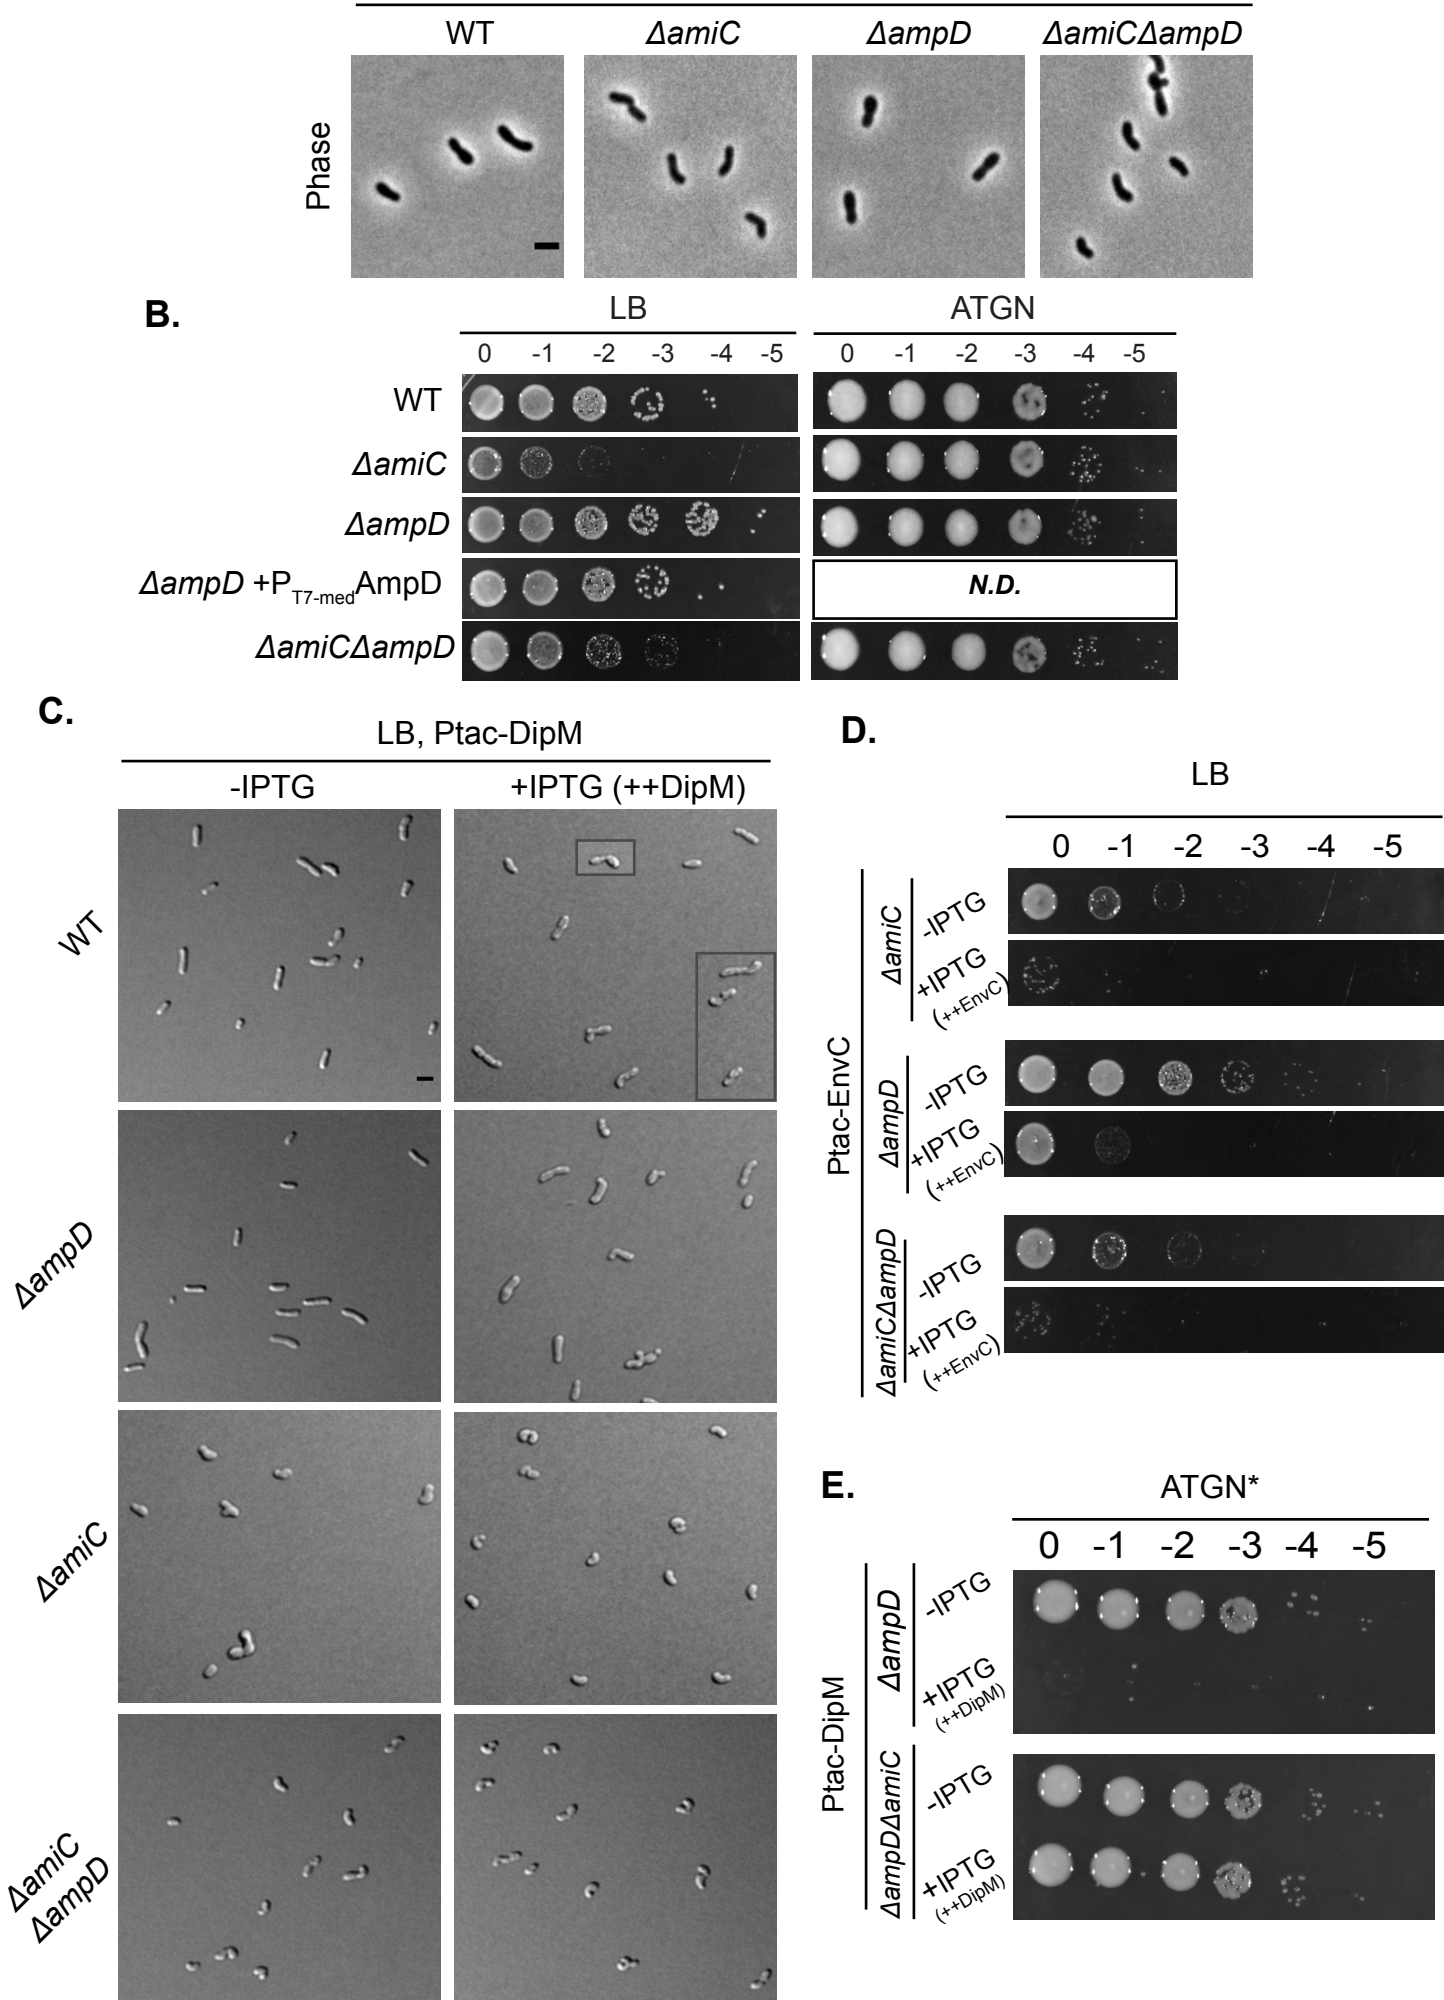

**Supplementary Figure 6. Characterization of *A. tumefaciens* amidases and impact of DipM overproduction.** (A) Phase contrast images of WT,  $\Delta amiC$ ,  $\Delta ampD$ , and  $\Delta amiC\Delta ampD$  cells grown in ATGN. Scale bar = 2  $\mu$ m. (B) Viability spot assays of WT,  $\Delta amiC$ ,  $\Delta ampD$ , and  $\Delta amiC\Delta ampD$  cells grown in LB and ATGN. (C) DIC images of WT,  $\Delta amiC$ ,  $\Delta ampD$ , and  $\Delta amiC\Delta ampD$  cells grown LB in the absence (left) or presence (right) of DipM overproduction (++)DipM). Scale bar = 2  $\mu$ m. (D) Cell viability  $\Delta amiC$ ,  $\Delta ampD$ ,  $\Delta amiC\Delta ampD$  cells containing empty plasmid ( $P_{tac}$ -Empty) or overproducing EnvC (+IPTG, ++EnvC). (E) Viability spot assays of  $\Delta ampD$  and  $\Delta amiC\Delta ampD$  cells grown in ATGN in the absence (++)DipM or presence of the inducer IPTG. ++DipM indicates that DipM is being overproduced. \*Since  $\Delta amiC$  has a strong viability defect in LB, the DipM overproduction data was presented in ATGN for better assessment of the DipM overproduction phenotype.

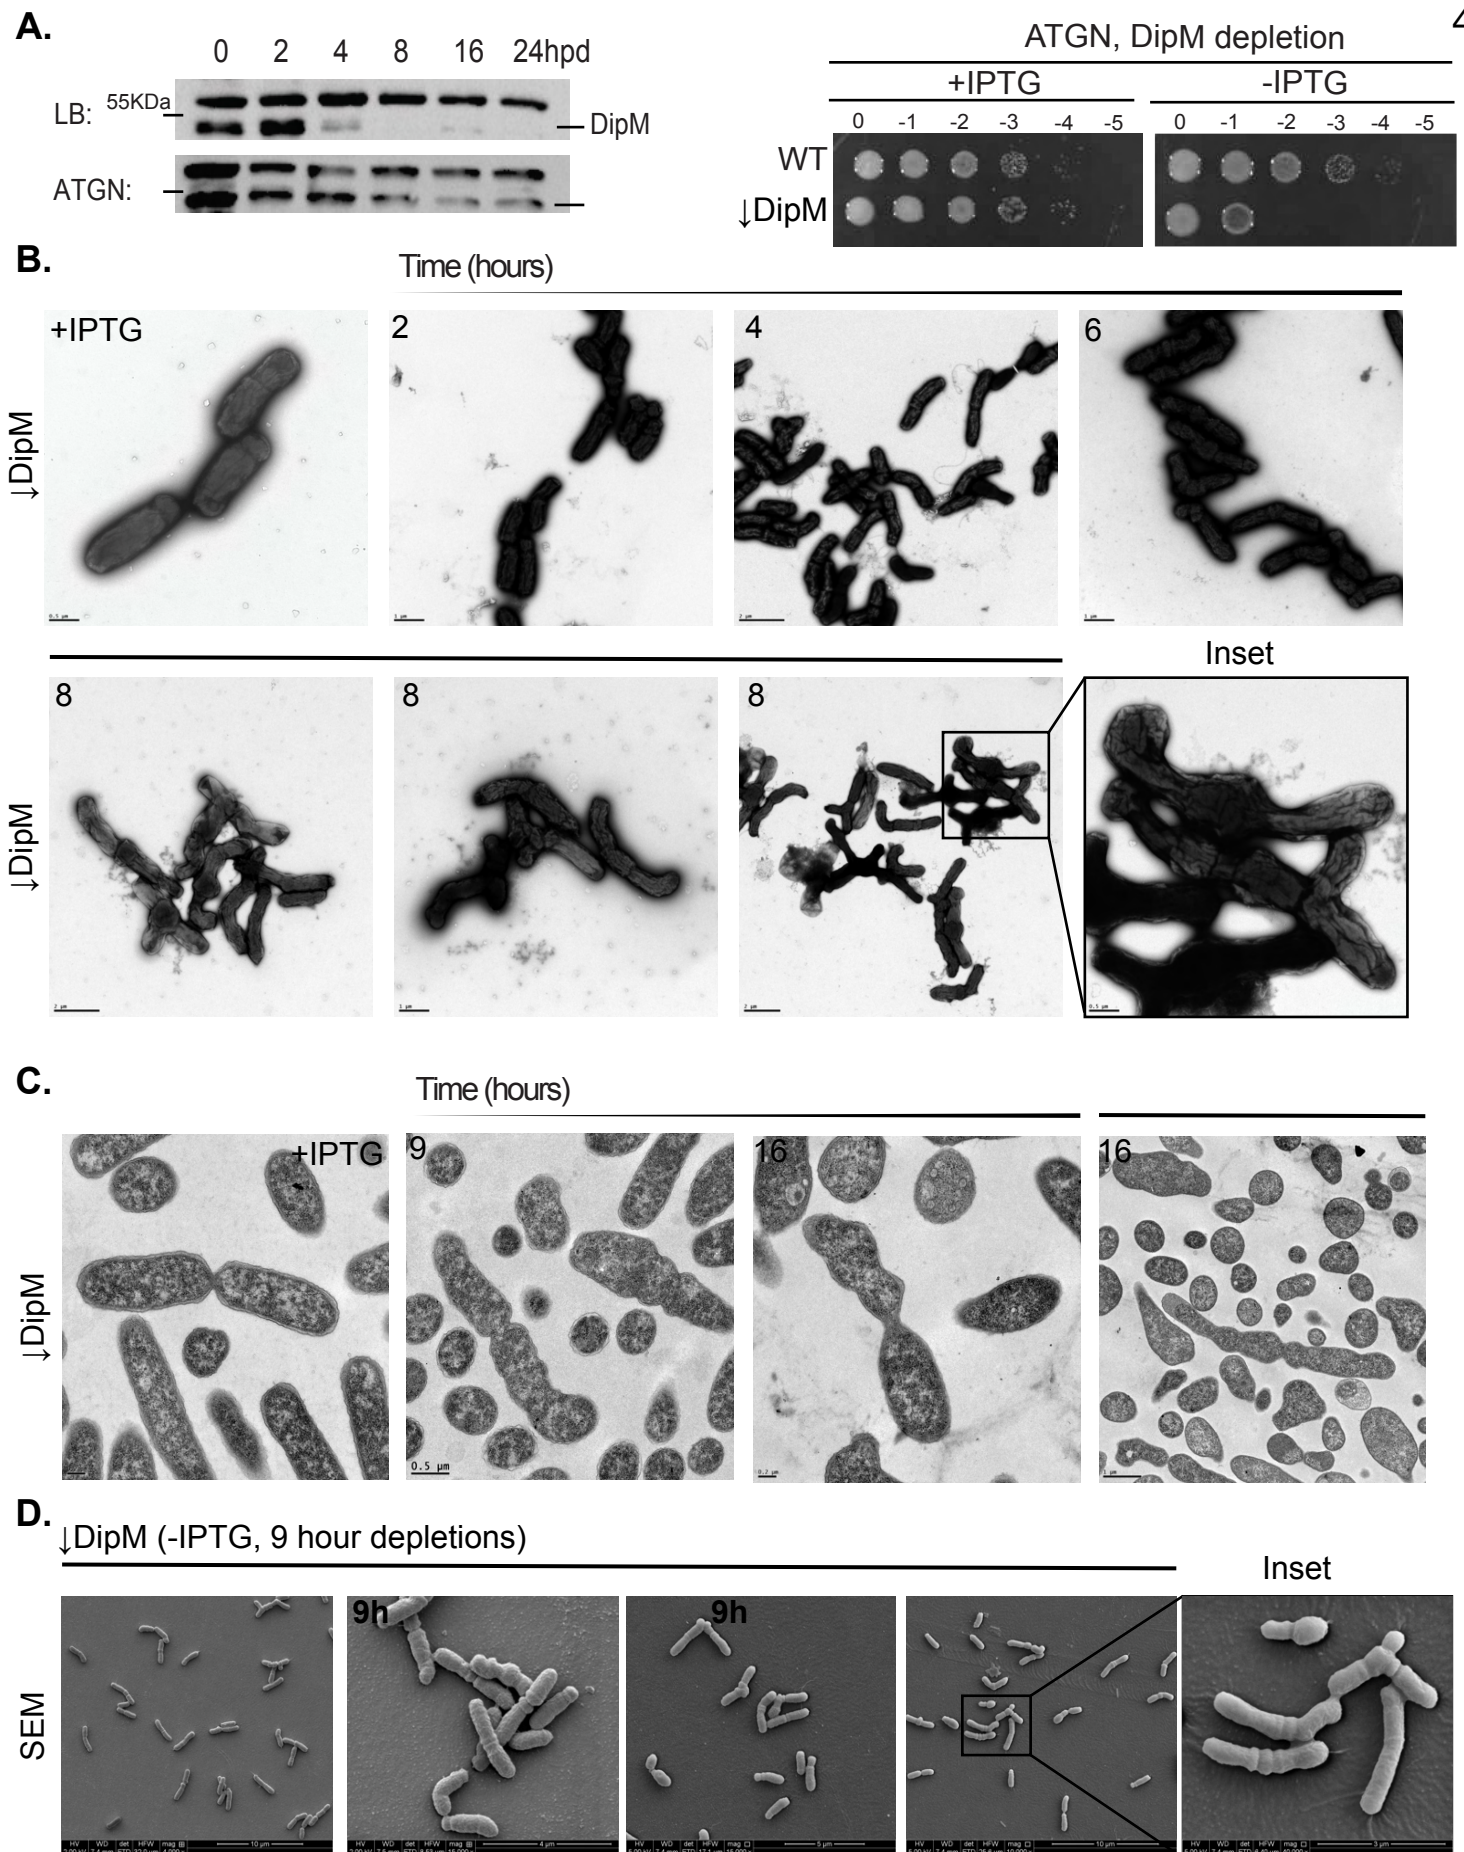

**Supplementary Figure 7. Morphological defects increase over time during DipM depletion.** (A, left) Western blots reveal the time course of DipM depletion in LB and ATGN. (A, right) Viability spot assays of WT and DipM depletion strain in ATGN in the presence and or absence of IPTG. (B) Whole cell transmission electron microscopy of replete (+IPTG) and DipM depleted cells at 2, 4, 6, and 8 hours of depletion in LB. Note, scale bars are not uniform and are (moving left to right and top to bottom) 0.5  $\mu$ m, 1  $\mu$ m, 2  $\mu$ m, 1  $\mu$ m, 2  $\mu$ m, 1  $\mu$ m, 2  $\mu$ m, and 0.5  $\mu$ m. (C) Thin section transmission electron microscopy of replete (+IPTG) and DipM depleted cells after 9 hours of depletion in LB. Scale bars are (moving left to right) 0.2  $\mu$ m, 0.5  $\mu$ m, 0.2  $\mu$ m, 1  $\mu$ m. (D) Scanning electron microscopy of DipM depleted cells after 9 hours of depletion in LB. Scale bars are 10  $\mu$ m, 4  $\mu$ m, 5  $\mu$ m, 10  $\mu$ m, and 3  $\mu$ m.



### 3 Supplementary Video Captions

**Supplementary Video 1.** Growth of WT *A. tumefaciens* cells on agarose pads. DIC image series of WT growing on a 1.25% LB agarose pad. Images were acquired every 10 minutes and the movie is played at 8 frames per second for a total of 43 frames. Scale bar = 2  $\mu\text{m}$ .

**Supplementary Video 2.** Growth of RgsM depletion strain on agarose pads. DIC image series of the DipM depletion in the absence of the inducer IPTG and growing on a 1.25% ATGN agarose pad. Cells were pre-depleted in liquid 6 hours before starting the time-lapse. Images were acquired every 10 minutes and the movie is played at 8 frames per second for a total of 110 frames. Scale bar = 2  $\mu\text{m}$ .

**Supplementary Video 3.** Growth of hypercurved  $\Delta envC$  cells on agarose pads. DIC image series of  $\Delta envC$  growing on a 1.25% LB agarose pad. Images were acquired every 10 minutes and the movie is played at 8 frames per second for a total of 91 frames. Scale bar = 2  $\mu\text{m}$ .

**Supplementary Video 4.** Growth of DipM depletion on agarose pads. DIC image series of the DipM depletion in the absence of the inducer IPTG and growing on a 1.25% LB agarose pad. Cells were pre-depleted in liquid 6 hours before starting the time-lapse. Images were acquired every 5 minutes and the movie is played at 8 frames per second for a total of 77 frames. Scale bar = 2  $\mu\text{m}$ .

**Supplementary Video 5.** Growth of hypercurved  $\Delta amiC$  cells on agarose pads. DIC image series of  $\Delta amiC$  growing on a 1.25% LB agarose pad. Images were acquired every 5 minutes and the movie is played at 8 frames per second for a total of 121 frames. Scale bar = 2  $\mu\text{m}$ .

**Supplementary Video 6.** Growth of hypercurved  $\Delta envC\Delta amiC$  cells on agarose pads. DIC image series of  $\Delta envC\Delta amiC$  growing on a 1.25% LB agarose pad. Images were acquired every 5 minutes and the movie is played at 8 frames per second for a total of 96 frames. Scale bar = 2  $\mu\text{m}$ .

**Supplementary Video 7.** Growth of  $\Delta amiC$  cells during DipM depletion on agarose pads. DIC image series of the  $\Delta amiC$  DipM depletion strain in the absence of the inducer IPTG and growing on a 1.25% LB agarose pad. Cells were pre-depleted in liquid 6 hours before starting the time-lapse. Images were acquired every 10 minutes and the movie is played at 8 frames per second for a total of 109 frames. Scale bar = 2  $\mu\text{m}$ .

**Supplementary Video 8.** Growth of  $\Delta envC$  cells during DipM depletion on agarose pads. DIC image series of the  $\Delta envC$  DipM depletion strain in the absence of the inducer IPTG and growing on a 1.25% LB agarose pad. Cells were pre-depleted in liquid 6 hours before starting the time-lapse. Images were acquired every 10 minutes and the movie is played at 8 frames per second for a total of 102 frames. Scale bar = 2  $\mu\text{m}$ .

#### 4 Supplementary References

- Choi K-H, Gaynor JB, White KG, Lopez C, Bosio CM, Karkhoff-Schweizer RR, Schweizer HP. 2005. A Tn7-based broad-range bacterial cloning and expression system. *Nat Methods* 2:443.
- Figueroa-Cuilan W, Daniel JJ, Howell M, Sulaiman A, Brown PJB. 2016. Mini-Tn7 insertion in an artificial attTn7 site enables depletion of the essential master regulator *ctrA* in the phytopathogen *Agrobacterium tumefaciens*. *Appl Environ Microbiol* 82.
- Figueroa-Cuilan W, Howell M, Richards C, Randich A, Yadav A, Cava F, Brown P. 2020. Induction of AmpC-mediated  $\beta$ -lactam resistance requires a single lytic transglycosylase in *Agrobacterium tumefaciens*. *bioRxiv* 1–52.
- Khan SR, Gaines J, Roop RM, Farrand SK. 2008. Broad-host-range expression vectors with tightly regulated promoters and their use to examine the influence of TraR and TraM expression on Ti plasmid quorum sensing. *Appl Environ Microbiol* 74:5053–5062.
- Simon R, Priefer U, Pühler A. 1983. A Broad Host Range Mobilization System for In Vivo Genetic Engineering: Transposon Mutagenesis in Gram Negative Bacteria. *Bio/Technology* 1:784–791.
